1  
2 **Main Manuscript for**

3  
4 **Deep Brain Stimulation restores information processing in**  
5 **parkinsonian cortical networks**

6  
7 Charlotte Piette<sup>1,2</sup>, Sophie Ng Wing Tin<sup>3,4</sup>, Astrid De Liège<sup>5</sup>, Coralie Bloch-Queyrat<sup>6</sup>, Bertrand  
8 Degos<sup>1,5#</sup>, Laurent Venance<sup>1#</sup>, Jonathan Touboul<sup>2#</sup>

9  
10 <sup>1</sup> Dynamics and Pathophysiology of Neuronal Networks Team, Center for Interdisciplinary Research in  
11 Biology, Collège de France, CNRS, INSERM, PSL University, 75005 Paris, France

12 <sup>2</sup> Department of Mathematics and Volen National Center for Complex Systems, Brandeis University,  
13 MA Waltham, USA

14 <sup>3</sup> Service de Physiologie, Explorations Fonctionnelles et Médecine du Sport, Assistance Publique-  
15 Hôpitaux de Paris (AP-HP), Avicenne University Hospital, Sorbonne Paris Nord University, 93009  
16 Bobigny, France

17 <sup>4</sup> Inserm UMR 1272, Sorbonne Paris Nord University, 93009 Bobigny, France

18 <sup>5</sup> Department of Neurology, Avicenne University Hospital, Sorbonne Paris Nord University, 93009  
19 Bobigny, France

20 <sup>6</sup> Department of Clinical Research, Avicenne University Hospital, Assistance Publique-Hôpitaux de  
21 Paris (AP-HP), 93009, Bobigny, France

22 #: equal contribution

23  
24 \*Corresponding authors: Charlotte Piette, Jonathan Touboul, Laurent Venance

25  
26 **Email:** [charlotte.piette@hotmail.fr](mailto:charlotte.piette@hotmail.fr) , [jtouboul@brandeis.edu](mailto:jtouboul@brandeis.edu) , [laurent.venance@college-de-france.fr](mailto:laurent.venance@college-de-france.fr)

27  
28 **Author Contributions:** Conceptualization: J.T., C.P., L.V., B.D.; J.T. and C.P. carried out the  
29 conception and the design of the computational model; C.P. analyzed the simulations of the model; B.D.  
30 recruited the cohort of patients for EEG recordings; S.N.W.T., A.D.L. and B.D. performed EEG  
31 acquisition; C.P. analyzed the EEG data; C.P. wrote the manuscript. J.T., L.V., B.D. and C.P. have  
32 edited and corrected the manuscript.

33  
34 **Competing Interest Statement:** The authors declare no competing interests.

35  
36 **Classification:** Biological sciences. Neuroscience.

37  
38 **Keywords:** deep brain stimulation, synchronization, excitability, information processing, model

39  
40 **This PDF file includes:**

41 Main Text  
42 Figures 1 to 4

45 **Abstract**

46            Parkinson's disease (PD) is a neurodegenerative disorder associated with alterations  
47 of neural activity and information processing primarily in the basal ganglia and cerebral cortex.  
48 Deep brain stimulation (DBS) of the subthalamic nucleus (STN-DBS) is the most effective  
49 therapy when patients experience levodopa-induced motor complications. A growing body of  
50 evidence points towards a cortical effect of STN-DBS, restoring key electrophysiological  
51 markers, such as excessive beta band oscillations, commonly observed in PD. However, the  
52 mechanisms of STN-DBS remain elusive. Here, we aim to better characterize the cortical  
53 substrates underlying STN-DBS-induced improvement in motor symptoms. We recorded  
54 electroencephalograms (EEG) from PD patients and found that, although apparent EEG  
55 features were not different with or without therapy, EEG signals could more accurately predict  
56 limb movements under STN-DBS. To understand the origins of this enhanced information  
57 transmission under STN-DBS in the human EEG data, we investigated the information  
58 capacity and dynamics of a variety of computational models of cortical networks. The extent  
59 of improvement in decoding accuracy of complex naturalistic inputs under STN-DBS depended  
60 on the synaptic parameters of the network as well as its excitability and synchronization levels.  
61 Additionally, decoding accuracy could be optimized by adjusting STN-DBS parameters.  
62 Altogether, this work draws a comprehensive link between known alterations in cortical activity  
63 and the degradation of information processing capacity, as well as its restoration under DBS.  
64 These results also offer new perspectives for optimizing STN-DBS parameters based on  
65 clinically accessible measures of cortical information processing capacity.

66

67

68

**Significance statement:** Parkinson's disease, a neurodegenerative disorder associated with a variety of motor symptoms, is due to the progressive degeneration of dopaminergic neurons. Neuronal networks in turn display abnormal activity associated with high excitability and abnormal synchronization. Treatments based on the electrical stimulations of deep brain nuclei (DBS) provide major symptomatic improvement, but their mechanisms of action remain unknown. Here, using mathematical models of the cortical circuits involved, we show that DBS restores neuronal ability to encode and transmit information. We further show that movements from human patients can be better predicted from brain signals under treatment. These new theory and metrics open the way to personalized and adaptive DBS allowing to personalize stimulation patterns to each patient.

69 **Main Text**

70

71

72 **Introduction**

73         Parkinson's disease (PD) is a neurodegenerative disorder associated with motor  
74 symptoms, including bradykinesia, rigidity, and tremor (1). These motor symptoms result from  
75 the progressive loss of dopaminergic innervation in the basal ganglia and alterations of  
76 neuronal activity in cortico-basal ganglia-thalamic circuits. In particular, at the cortical level,  
77 changes in excitability (2-4) and inhibitory activity (5-8), excessive oscillations and elevated  
78 synchronization in the beta frequency band (9-10), together with structural changes (11), have  
79 been reported in PD patients and animal models (12-20), as reviewed in (4,21). Furthermore,  
80 functional alterations of information processing during movement execution have been  
81 described in PD animal models, as illustrated by less precisely timed cortical spiking activity  
82 (22,23) and decreased sensitivity to incoming inputs (22,24,25). Altogether, this body of  
83 experimental evidence suggests that the detrimental changes in cortical dynamics arising in  
84 PD blur motor-related information and lead to a decrease in signal-to-noise that propagates to  
85 downstream circuits.

86         Chronic high-frequency stimulation of deep brain structures (called Deep Brain  
87 Stimulation, DBS), targeting the subthalamic nucleus (STN-DBS) or internal globus pallidus in  
88 the basal ganglia, has been shown to provide an effective symptomatic treatment in PD  
89 (1,26,27). However, the mechanisms of action of STN-DBS remain unclear (28-31). Various  
90 hypotheses have been proposed to explain the therapeutic effect of STN-DBS. In particular,  
91 several lines of evidence point out that, in PD patients and rodent models of PD, STN-DBS  
92 efficacy could be cortically mediated (32,18,13). Moreover, STN-DBS was shown to curtail  
93 primary motor cortex (M1) hyperexcitability in PD patients (33,3,34) and in PD rodent models  
94 (12,13), and to dampen cortical beta oscillations and bursting activity patterns (35-37). As a  
95 possible mechanistic explanation, STN-DBS is thought to recruit cortical GABAergic  
96 interneurons, as indicated by the restored cortical inhibition in PD patients (38,39) and by the  
97 increased activity in somatostatin (SST)-expressing cells in rodents (13). Hence, by restoring  
98 the dynamics of cortical networks, we hypothesize that STN-DBS could improve their  
99 information processing capacity, accompanying the alleviation of motor symptoms. In line with  
100 this hypothesis, a recent theoretical work showed that high-frequency stimulation, mimicking  
101 STN-DBS, restores the physiological activity of a neuronal network, by curtailing highly  
102 synchronized activity, and reinstates its information processing capabilities (40).

103         Here, we aimed at exploring this hypothesis based on EEG recordings from PD patients  
104 under pharmacological and STN-DBS treatments, and based on computational models. While  
105 EEG features did not show statistical differences between the OFF and ON-therapy conditions,  
106 we found that STN-DBS improved the ability to predict the type of movement that patients were  
107 planning to execute. To better understand the origins of the improvement in information  
108 processing capacity under STN-DBS, we tested the impact of STN-DBS on information  
109 encoding in multiple spiking models of cortical networks exhibiting various population activity  
110 and dynamics. We found that STN-DBS could reliably improve decoding accuracy of complex  
111 naturalistic inputs across most model configurations, and that STN-DBS parameters could be  
112 optimized according to the pathological activity profile of the computational model. Finally, we  
113 observed that STN-DBS could act by decreasing the excitability of pyramidal neurons, which  
114 in turn could shift the synchronization level of the network. This phenomenon was particularly

115 exacerbated in PD networks exhibiting high levels of synchrony. Hence, our work finely  
116 investigates links between known alterations in cortical activity and the degradation of  
117 information processing capacity, and also opens new perspectives for more finely optimizing  
118 STN-DBS parameters, by relying on clinically accessible measures of cortical information  
119 processing capacity.

120

121

## 122 **Results**

123

### 124 **Improvement of movement decoding from human EEG under STN-DBS**

125 We set out to test the theoretical hypothesis that cortical circuits in PD patients display  
126 reduced information processing capabilities that are restored under STN-DBS. We aimed to  
127 quantify cortical information non-invasively in humans, using EEG, and compare these  
128 measures between control individuals and PD patients ON or OFF-therapy. To this purpose,  
129 we recruited a cohort of twenty human subjects, composed of 10 control individuals and 10  
130 PD patients implanted with STN-DBS electrode (*Material & Methods* and **Table S1**), and  
131 performed multi-channel EEG recordings combined with electromyograms during the  
132 spontaneous execution of three movements. The three movements belonged to the clinical  
133 MDS-UPDRS severity scale for PD (41): finger tapping (item 3.4), fist clenching (item 3.5) and  
134 hand pronation (item 3.6) (see *Material & Methods* and **Movie S1** and **S2**). Electromyograms  
135 of the specific muscles involved (musculus extensor indicis, flexor digitorum superficialis and  
136 profundus, and pronator teres muscles, respectively) were recorded and used to align EEG  
137 recordings relative to the onset of movement, allowing the extraction of movement-related  
138 potentials (**Fig. 1A**). PD patients were tested in both OFF and ON-therapy conditions. In OFF-  
139 therapy, patients were tested with STN-DBS OFF and weaned for more than 12 hours from  
140 their usual pharmacological antiparkinsonian therapy, while in ON-therapy, both STN-DBS and  
141 pharmacological medication were reinstated. While PD patients ON-therapy and control  
142 subjects successfully executed all three movements, two patients OFF-therapy were not able  
143 to perform enough repetitions for all three movements (< 50 trials) and one additional patient  
144 was not able to execute the hand pronation movement. In one last patient, the EEG signal was  
145 too noisy. These patients were excluded from further analyses since the associated dataset  
146 would not contain enough data points to be analyzed accurately. For statistical purpose (n=7  
147 PD patients, n=10 control subjects), we centered most of our analyses of the EEG signals  
148 during the execution of two movements – finger tapping and fist clenching.

149 To investigate whether EEG features varied across conditions, we quantified the  
150 average beta band power during each movement, either across the full session (**Fig. 1B** for  
151 finger tapping) or across individual trials, restricting the time window of the EEG signals to the  
152 pre-movement preparatory period (**Fig. 1C** for finger tapping and **Fig. S1B** for first clenching).  
153 A 700 ms-window preceding the EMG-detected onset of muscle activation was chosen in  
154 accordance with the start time of pre-movement readiness potentials reported in previous  
155 works (42). We focused on the electrode positioned over the primary motor cortex and  
156 contralateral to the movement side (labelled C electrode). During finger tapping, no differences  
157 in the average beta band power were observed across conditions (paired Wilcoxon test:  
158 OFF/ON:  $p=0.81$  and  $p=0.81$  for full session and individual trials, respectively; Wilcoxon test:  
159 OFF/Control:  $p=0.60$  and  $p=0.37$  respectively; ON/Control:  $p=0.60$  and  $p=0.42$ ); in particular  
160 no excessive beta-band power could be detected in PD patients OFF therapy. Alternatives

161 measures of beta band power yielded a similar conclusion (**Fig. S1A**). In addition, we  
162 quantified the maximal amplitude of the preparatory movement-related potentials and did not  
163 find significant differences between OFF/ON-therapy conditions ( $p=0.94$ ). Similarly, the trial-  
164 to-trial temporal variability, quantified by the standard deviation of the voltage signals across  
165 trials, did not reveal any modulation by STN-DBS ( $p=0.94$ ). These observations were valid  
166 during fist clenching (**Fig. S1B**) and were consistent across electrodes (**Fig. S1C**).

167 Hence, although turning STN-DBS ON elicited an improvement in movement  
168 execution, no differences in basic EEG features were visible between the OFF and ON-therapy  
169 conditions. These observations are in line with previous EEG studies (43,44) (for review, see  
170 43). We thus reasoned that quantifying cortical information might be more sensitive to capture  
171 latent signatures of movement planning in the EEG signals, and reveal differences in motor  
172 encoding between OFF/ON-therapy conditions. To this purpose, we compared the quality of  
173 decoding the identity of the executed movement from the EEG signals across conditions.  
174 Three supervised machine-learning algorithms – linear discriminant analysis (LDA), nearest  
175 centroid classifier (NN) and multinomial logistic regression (MLR) –, were trained and tested  
176 on EEG signals recorded during the preparatory period of the movement, to avoid biases due  
177 to the quality of movement execution (**Fig. 1D**). We ensured that movement identity could be  
178 decoded from control subjects and determined which configuration of input signals – either  
179 from individual trials or six-trial averages, and either from a single or a combination of  
180 electrodes – yielded the highest decoding accuracy (**Fig. 1E, Fig. S2A and Table S2**). When  
181 decoding two movements (finger tapping vs. fist clenching), we found that the signals from the  
182 electrodes contralateral to the movement were the most informative using LDA algorithm.  
183 Furthermore, combining the signals of four contralateral electrodes (Fp, F, C and P electrodes)  
184 yielded the best average accuracy across subjects (60.8%,  $p = 0.0059$ ). Six-trial average  
185 allowed for better decoding accuracies than individual signals.

186 To test the impact of STN-DBS on cortical information processing, we compared the  
187 accuracy of decoding limb movement from EEG signals for each of the STN-DBS-implanted  
188 PD patients in both OFF/ON-therapy conditions. A significant improvement was found in the  
189 majority of patients (from 67 to 85%) once ON-therapy when decoding either two or three  
190 movements. More precisely, for 2 movements, out of 7 PD patients, 5 showed a significant  
191 increase in decoding accuracy using MLR and LDA algorithms, and 6 for NN; for 3 movements,  
192 out of 6 patients, 5 displayed increased accuracy for MLR and NN and 4 for LDA. On average,  
193 decoding of two movements performed by LDA and NN classifiers was significantly increased  
194 in the ON-therapy condition (LDA: 59.5% vs. 50.3 %,  $p = 0.0156$ ; NN: 64.6 % vs. 51.1 %,  
195  $p = 0.0312$ ; MLR: 63.8 % vs. 51.1 %,  $p = 0.0781$ ), and reached similar levels to those of control  
196 subjects (LDA:  $p = 0.193$ ; NN:  $p = 0.962$ ; MLR:  $p = 0.601$ ). In contrast, decoding accuracy in  
197 the OFF-therapy condition relative to control was significantly worse (LDA:  $p < 0.001$ ; NN:  $p$   
198  $= 0.0068$ ; MLR:  $p = 0.0097$ ) and did not differ on average to random chance level (**Fig. 1F,**  
199 **Fig. S2B and Table S3**). A similar trend was observed when considering other input  
200 configurations (individual vs. averaged trials, and using either all, or only the C electrode  
201 contralateral to the movement side) and when classifying the three movements. Yet, in these  
202 configurations, due to our small sample size, no statistical significance was observed between  
203 patients OFF and ON-therapy. Nonetheless, decoding accuracies OFF-therapy were  
204 significantly lower compared to control patients (**Fig. S2C and S2D and Table S3**). To verify  
205 whether these results could be affected by the quality of detection of movement onset, we  
206 repeated our analyses on control subjects by adding an artificial jitter of  $\pm 50$  to  $\pm 200$  ms to



207 the original movement onset detected from the EMG recordings. While the decoding  
208 performance decreased, as expected from the addition of a source of randomness to the  
209 signal, accuracies remained consistently higher than that of PD patients OFF-therapy (**Fig.**  
210 **S2E** and **Table S4**), indicating that possible differences in the precision of detecting movement  
211 onset across conditions could not fully account for changes in decoding accuracy.

212 Overall, our EEG analyses indicate that hidden features, not easily captured by direct  
213 quantifications of movement-related potentials, may underlie the differences in decoding  
214 capacity observed between recordings of patients OFF vs. ON-therapy. These hidden features  
215 originate most likely from cortical dynamics, the access to which remains relatively limited in  
216 EEG.

217

### 218 **Emulating EEG results using motor cortex network spiking models**

219 To emulate the results obtained from EEG data and further explore the links between  
220 cortical dynamics and information transmission, we developed a spiking network model of layer  
221 5 of the primary motor cortex (M1), including three neuronal populations (**Fig. 2A**): pyramidal  
222 excitatory cells, parvalbumin (PV) and somatostatin (SST) inhibitory interneurons. The model  
223 relied on realistic parameters, based on our previous model (13) and published experimental  
224 data (**Tables S5-6**). Notably, consistent with experimental data, the model included the  
225 absence of a feedback connection from pyramidal cells to SST interneurons (45), as well as  
226 the fact that PV interneurons inhibit each other strongly while providing little inhibition to other  
227 interneurons, in contrast to SST interneurons (46,47). To recapitulate the diversity of cortical  
228 dynamics and activity regimes that are associated with different disease stages over the  
229 course of PD, different subtypes of PD as well as patient-to-patient variation in cortical wiring  
230 preceding PD onset, we generated multiple model configurations. We randomly varied three  
231 parameters of the original model, consistent with reports of altered excitation/inhibition balance  
232 in PD (2-8,12,13): the synaptic strengths reciprocally connecting pyramidal cells and PV  
233 interneurons ( $w_e$  for pyramidal to PV and  $w_i$  for PV to pyramidal cells), as well as the excitatory  
234 external input  $I_{ext}$  received by pyramidal cells (**Fig. S3A**). This collection of network models  
235 generated a constrained repertoire of activity profiles (**Fig. 2B**), from highly regular periodic  
236 behaviors to asynchronous regimes, and from low to high firing rates. To organize the models  
237 according to the properties of the spontaneous dynamics they displayed, each network activity  
238 regime was characterized by (i) the mean firing rate of pyramidal neurons and (ii) the entropy  
239 of the average probability of pyramidal cells firing a spike, a proxy for synchrony (see also **Fig.**  
240 **S3** for additional quantifications and characterizations of the activity of the different networks).  
241 Two broad regimes emerged from this classification: oscillating regimes associated with low  
242 entropy (1-2 bits) and asynchronous regimes with high (> 3 bits) entropy. A small number of  
243 parameter configurations yielded relatively sparse activity (firing rate < 1 Hz) and intermediate  
244 entropy levels, creating a narrow tunnel connecting the two larger clusters of activity; no  
245 parameter combination generated intermediate levels of entropy with medium (1-4 Hz) to high  
246 (> 4 Hz) firing rates (**Fig. 2B**).

247 Based on this broad benchmark of network profiles, we investigated the effect of STN-  
248 DBS on information processing in a subset of networks (n=44), by examining the network  
249 responses to complex and naturalistic stimuli, *i.e.* containing some periodicity and noise,  
250 encoding possibly multiple latent features and showing trial-to-trial variability. To this purpose,  
251 we built a set of complex non-stationary signals from audio-recordings (**Fig. 2C** and *Material*  
252 *& Methods*), that served as external inputs to pyramidal cells. The audio nature of the signals

253 is indifferent to our purposes, but it captures features of naturalistic inputs, that could mimic  
254 the nature of inputs received by pyramidal cells of the motor cortex during movement  
255 preparation. Indeed, it provides us with a set of non-stationary signals (different spoken words)  
256 with trial-to-trial variability in the repetitions of the same sentences by the same individual, and  
257 two latent variables: the identity of the person speaking (the voice), and the meaning of the  
258 sentence. The voice or the meaning of the sentences, shared across different stimuli, can  
259 participate in creating common underlying features, such as the preferential activation of  
260 subsets of pyramidal cells (due to over-representation of a frequency for a given voice across  
261 sentences) or a common temporal pattern of activation (for a similar sentence across voices).  
262 We thus aimed at decoding these latent features by training the same supervised machine  
263 learning classifiers used for decoding movement identity from EEG signals (**Fig. 2D** and **S4A**,  
264 respectively). In absence of STN-DBS, the highest decoding accuracies ( $> 35\%$ ) were  
265 observed for very low-activity regimes ( $< 1$  Hz), as well as high-entropy regimes with low firing  
266 rates ( $\sim 1$ -2 Hz). In contrast, the lowest accuracy scores were obtained for low-entropy (1-2  
267 bits) or high-activity regimes ( $> 4$  Hz), very close to random chance level (equal to 25%  
268 decoding accuracy).

269 Then, to mimic STN-DBS, we applied high-frequency pulse-like inputs to all three  
270 populations (13). Indeed, the currents associated with STN-DBS generates sequences of  
271 depolarizations along axons and synaptically-mediated depolarizations in the cortex, that  
272 originate from different anatomical routes: pyramidal cells can be antidromically activated  
273 through the hyperdirect pathway and orthodromically through the rapid STN-cortex pathway  
274 and the basal ganglia-thalamo-cortical route (48,49,12). Antidromic spikes can also excite  
275 deep-layer parvalbumin (PV) interneurons through the axon collaterals of pyramidal cells  
276 (antidromic axonal reflex) (50). SST interneurons have been shown to be activated under STN-  
277 DBS (13); while the mechanisms mediating the recruitment of SST interneurons remain to be  
278 investigated and most likely involve superficial layers, not included in our model, a high-  
279 frequency external current was added to SST interneurons to replicate experimental  
280 observations. For a fixed set of STN-DBS parameters (200 pA pulses at 130 Hz), decoding  
281 accuracy was increased under STN-DBS in 59% or 68% of networks when decoding the  
282 meaning or the voice respectively (**Fig. 2E** and **S4A**).

283 Altogether, we recapitulated the experimental observations made on EEG recordings  
284 by applying the same quantification of information – the decoding accuracy – to spiking  
285 network models in response to naturalistic stimuli. We found that STN-DBS consistently  
286 improved information transmission. These results allow us to further examine theoretically how  
287 the efficacy of STN-DBS can be optimized and predicted according to the properties of the  
288 network.

289

### 290 **Optimizing STN-DBS parameters for maximal decoding accuracy**

291 In **Fig. 2E**, the extent of STN-DBS-induced change in decoding accuracy scores varied  
292 across network configurations. This variability may arise from differences in network sensitivity  
293 to external stimulation, which could be compensated by varying stimulation intensity. To test  
294 whether decoding accuracy could be maximized by varying STN-DBS parameters and explore  
295 how these optimal parameters relate to each network configuration, we varied both the  
296 amplitude and frequency of STN-DBS pulses (**Fig. 3A** and **Fig. S4B**) and evaluated changes  
297 in decoding accuracy in 20 network configurations exhibiting various levels of excitability and  
298 synchronization. The subset of network configurations examined here covered most regimes

299 of the 2D-map presented in **Fig. 2B**. With optimal STN-DBS parameters, turning the  
300 stimulation ON always improved the decoding accuracy, with an average 60% (range from  
301 30% up to 100%) increase in decoding accuracy compared to the OFF-DBS condition. We  
302 found that a single parameter – the total current of the stimulation (frequency multiplied by  
303 amplitude multiplied by pulse duration) – summarized well the effects of varying both STN-  
304 DBS frequency and amplitude: indeed, a notable peak in decoding accuracy arose for all  
305 network configurations when projecting STN-DBS amplitude and frequency onto the total  
306 current of the stimulation (**Fig. S4B**).

307 In line with the necessity for individualized clinical adjustments of STN-DBS  
308 parameters, information decoding could not be optimized across all network configurations  
309 using the same unique set of STN-DBS parameters. Indeed, the optimal STN-DBS parameters  
310 varied between network configurations (**Fig. 3B** and **Fig. S4B**). Importantly, for each network,  
311 the optimal STN-DBS current was robust to the choice of classifiers (Pearson's correlation  
312 coefficient  $r = 0.81$ ,  $p < 0.001$  between MLR and NN and  $r = 0.92$ ,  $p < 0.001$  between MLR and  
313 LDA classifiers) and to the decoding feature (voice or meaning; Pearson's correlation  
314 coefficient  $r = 0.81$ ,  $p < 0.001$ ) (**Fig. 3C**). These results support the hypothesis that the optimal  
315 STN-DBS current mostly depends on the intrinsic features of the network rather than the  
316 decoding task. In the same idea, networks with initially low firing rates necessitated the lowest  
317 currents (50-100 pA), since higher currents ( $> 150$  pA) caused a complete and detrimental  
318 silencing of pyramidal cells (**Fig. 3B**). Among the three network configuration parameters we  
319 varied, the external excitatory input  $I_{ext}$  targeting pyramidal cells was strongly correlated with  
320 the intensity of the optimal STN-DBS current (Pearson's correlation coefficient  $r = 0.81$ ,  $p <$   
321  $0.001$ ) (**Fig. 3D** and **Fig. S4C**). In the majority of networks, we also found a large gap between  
322 the high intensity of efficient STN-DBS current compared with the average strength of the  
323 stimulus, which was two to four times smaller. This gap was not prejudicial to information  
324 processing, underlining the strong filtering capacity of the cortical network relative to its shared  
325 STN-DBS input.

326 These analyses indicate that decoding of naturalistic inputs can be efficiently optimized  
327 by fine-tuning STN-DBS total current. The optimal STN-DBS current depended on the network  
328 configuration, and could be predicted from the level of cortical excitability.

329

### 330 **Linking STN-DBS impact on decoding accuracy to cortical profiles**

331 To further decipher how STN-DBS affects the properties of the networks, and yields an  
332 improvement in information transmission, we studied a wider set of networks (those generated  
333 in **Fig. 2B**). We first investigated how STN-DBS impacted the firing rate and synchronization  
334 levels of pyramidal cells depending on network synaptic connectivity profile and intrinsic  
335 activity. Three main observations emerged from the comparison of OFF/ON STN-DBS  
336 conditions, using a fixed set of STN-DBS parameters (200 pA pulses at 130 Hz) (**Fig. 4A** and  
337 **Fig. S5A**): (i) high-frequency STN-DBS decreased the firing rate of pyramidal cells in 88 % of  
338 the network configurations, with at least a 50% reduction in firing rate in 62% of all networks;  
339 (ii) STN-DBS partially curtailed the synchronous activity of low-entropy regimes, resulting in  
340 increased entropy and decreased firing rate; (iii) high-entropy regimes became less entropic,  
341 yet without generating a regularized activity pattern imposed by STN-DBS. The strongest  
342 effects of STN-DBS were obtained in regimes dominated by a strong inhibition from PV to  
343 pyramidal neurons (high  $w_i$ ), and a low  $w_e/w_i$  ratio (Pearson's  $r(w_e/w_i, \Delta\text{Firing}/\text{Firing}) = 0.69$ ,  
344  $p < 0.001$  and  $r(w_i, \Delta\text{Firing}/\text{Firing}) = -0.71$ ,  $p < 0.001$ ) (**Fig. 4B** and **Fig. S5B**). Conversely, a



345 high  $w_e/w_i$  ratio was associated with an increase or no net change in firing rate under STN-  
346 DBS, while a strong external input  $I_{ext}$  rendered pyramidal cells more resistant to  
347 desynchronization (Pearson's  $r(I_{ext}, \Delta\text{Entropy}/\text{Entropy}) = 0.68$ ,  $p < 0.001$ ). Finally, STN-DBS  
348 did not alter the anti-correlation between pyramidal and PV firing rate, but accrued SST activity,  
349 hence enhancing SST inhibition on pyramidal cells (**Fig. S5C**).

350 Altogether, these observations suggest that STN-DBS is able to mitigate a wide  
351 spectrum of pathological cortical activity profiles. While STN-DBS was modeled as an external  
352 excitatory input to pyramidal, PV and SST neurons, its mechanism of action was paradoxically  
353 mediated by a decrease in excitatory tone. These results are in line with experimental findings,  
354 showing that the majority of pyramidal neurons decreased their firing rate whereas SST  
355 interneurons became activated under STN-DBS (13). We also found that the relative efficiency  
356 of STN-DBS depended on the intrinsic dynamics and connectivity of the network. Importantly,  
357 the impact of STN-DBS on cortical dynamics remained consistent when lowering the  
358 proportion of neurons receiving STN-DBS input (**Fig. S6A**).

359 To investigate how levels and patterns of cortical activity facilitate or hinder information  
360 encoding, we simplified the set of stimuli considered in the previous section and used constant  
361 or time-varying external stimuli as inputs targeting a subset of pyramidal cells (nine stimuli: two  
362 constant pulses, three Ornstein-Uhlenbeck processes and four deterministic ramps). We then  
363 compared the performance of supervised classifiers between OFF and ON STN-DBS. As  
364 observed in the decoding of naturalistic stimuli, high decoding accuracy ( $>55\%$ , with random  
365 decoding accuracy equal to 11.1 %) was found in very low-activity regimes and in high-entropy  
366 regimes with low firing rates ( $\sim 0$ -2 Hz) in the OFF condition (**Fig. 4C** and **Fig. S7A**). In contrast,  
367 the lowest accuracy scores ( $< 40\%$ ) were consistently obtained for low-entropy regimes. STN-  
368 DBS efficiently improved the decoding accuracy of low-entropy regimes, with up to 160 %  
369 increase (**Fig. 4D** and **Fig. S7B**). In comparison to changes in excitability induced by STN-  
370 DBS, changes in entropy were a stronger predictor of changes in accuracy (linear regression  
371 model of  $\Delta\text{Accuracy}$  based on MLR algorithm:  $\Delta\text{Firing}$ :  $t = -1.02$ ;  $p = 0.307$ ;  $\Delta\text{Entropy}$ :  $t = 9.58$ ,  
372  $p < 0.001$ ). Indeed, both the sign and relative change in entropy governed the change in  
373 decoding accuracy. As such, in contrast to low-entropy regimes, networks characterized by a  
374 high entropy, slightly decreased upon STN-DBS application, were associated with a small  
375 decrease in decoding accuracy under STN-DBS. The robustness of these observations was  
376 supported by the high correlation between the decoding accuracy results obtained across all  
377 three machine-learning algorithms (**Fig. S7A**, Pearson's  $r(\text{MLR}, \text{LDA}) = 0.96$ ;  $r(\text{MLR}, \text{NN}) =$   
378  $0.87$ ;  $r(\text{LDA}, \text{NN}) = 0.86$ ,  $p < 0.001$ ). These results were also consistent when varying the  
379 proportions of neurons recruited by STN-DBS (**Fig. S6B**).

380 These analyses reveal that the low-entropy regimes, the most detrimental regimes for  
381 decoding external stimuli, are desynchronized by STN-DBS through a decrease in pyramidal  
382 cell activity, and constitute the regimes for which the impact of STN-DBS on information  
383 processing is the most prominent. Overall, the observations from our modeling framework,  
384 once adapted to the clinics, could have important implications for patient screening and STN-  
385 DBS parameter optimization.

386  
387

## 388 Discussion

389

390 PD has been characterized by functional alterations of information processing in the  
391 motor cortex during movement execution (22,23,25), together with changes in excitability and  
392 levels of synchronization (15,19,14,4,21). Based on previous experimental data (13), we  
393 further hypothesized that STN-DBS restores physiological activity patterns at the cortical level.  
394 To test this hypothesis and explore the links between information processing capacity and  
395 cortical activity in PD and under STN-DBS, we relied on EEG recordings from PD patients and  
396 data-driven simplified models of motor cortex.

397 While we did not find changes in basic EEG features, such as beta synchronization  
398 levels, across the OFF and ON-therapy conditions, in line with previous EEG reports (43,44),  
399 decoding movement identity from EEG signals, occurring before movement execution, was  
400 consistently more accurate in control and ON-therapy condition vs OFF-therapy. Indeed, in the  
401 latest condition, decoding accuracy reached chance level. These data thus indicated that  
402 cortical activity conveys more reliable information in control conditions and ON-therapy. Yet,  
403 such functional differences between conditions were not easily captured by basic signal  
404 statistics of the EEG, likely because of its limited spatial and cell-type resolution and low signal-  
405 to-noise ratio. This last observation prompted us to develop a modeling approach initiated in  
406 previously published works (13,40). To draw a close parallel to the EEG data, our metric for  
407 quantifying information processing in computational models relied on decoding known external  
408 stimuli targeting pyramidal cells based on pyramidal cells responses. In line with previous  
409 studies (16,51), we found that low-entropy regimes, characterized by highly synchronous  
410 activity across pyramidal neurons, were the most detrimental regimes for information encoding,  
411 whereas regimes of sparse spiking activity were associated to the highest decoding scores.  
412 Our results were consistent throughout the set of stimuli investigated, from simple deterministic  
413 currents to trial-to-trial variable and spatio-temporally structured inputs. Deficiencies in  
414 information processing can reflect various aspects of PD symptoms and can be related to  
415 altered network dynamics. Indeed, hyperexcitability or highly synchronized activity prevent  
416 external stimuli from affecting the spatio-temporal structure of the network responses to  
417 external inputs, making it more difficult to extract the relevant signals, as observed  
418 experimentally (22-24). Such abnormal activity associated to a decreased signal-to-noise ratio  
419 might cause an elevation in the detection threshold that would delay the initiation and slow  
420 down the sequential activation of voluntary movements, *i.e.* bradykinesia. In direct relation to  
421 decoding external inputs, PD patients often exhibit impairments in discrimination and  
422 perception of sensory stimuli, showing reduced sensitivity for detecting tactile and haptic  
423 stimuli as well as proprioceptive inputs, and reduced precision to differentiate between two  
424 stimuli (52-56). Altered decoding can be caused by a loss of specificity and of functional  
425 segregation of receptive fields, which in the motor domain can lead to the inaccurate  
426 recruitment of muscles and rigidity (14,57-59).

427 As observed from the increase in decoding accuracy, STN-DBS dramatically improved  
428 information processing in low-entropy regimes, and has milder effects in networks with similar  
429 activity levels but high-entropy. Interestingly, closely aligned to our information indicators, STN-  
430 DBS improves not only movement initiation and motor sequence execution, but also  
431 somatosensory and proprioceptive discrimination in PD patients (60,61). In line with our  
432 hypothesis, the STN-DBS-induced improvement in information processing was accompanied  
433 by a restoration of more physiological activity patterns: a decrease in the firing rate of pyramidal  
434 neurons was observed in most network configurations, mediated in part by the recruitment of  
435 SST interneurons, consistent with previous experimental work in rodents demonstrating the

436 activation of cortical L5 SST interneurons and inhibition of pyramidal neurons under STN-DBS  
437 (12,13), and clinical studies (33,34,38,39). When applied to a low-entropy state, the decrease  
438 in firing rate further allowed a reduction in the level of synchronization of pyramidal cells spiking  
439 activity and the restoration of temporally richer dynamics, in accordance with experimental (18)  
440 and clinical findings (36,37).

441 We further investigated whether and how STN-DBS parameters could be adjusted to  
442 restore optimal information processing in cortical networks. We found that such optimization  
443 directly reflected the extent of STN-DBS-mediated desynchronization. In line with this result, a  
444 correlation between STN-DBS clinical efficacy and STN-DBS-mediated reductions in beta  
445 band oscillation power has been reported for STN (62,63) and at the cortical level (35). Our  
446 results also highlighted that STN-DBS efficiency is modulated by the initial regime of cortical  
447 activity. In particular, the higher the excitability of pyramidal cells (modeled by high values of  
448 the external current  $I_{ext}$ ), the higher the DBS current needed to be for optimized decoding. STN-  
449 DBS was also more effective at improving decoding accuracy in regimes characterized by a  
450 low entropy. Hence, we proposed that the levels of cortical excitability and synchronization  
451 could serve as predictive biomarkers of STN-DBS efficiency (64). Such features could be  
452 assessed in patients using transcranial magnetic stimulation and EEG recordings. If these  
453 predictions are first validated in the clinics, then statistics of cortical dynamics could be  
454 considered as additional criteria when screening PD patients for STN-DBS. We also observed  
455 that in our models the connectivity of the cortical circuit, controlling the excitation-inhibition  
456 balance, mattered in predicting STN-DBS efficiency: STN-DBS does not improve information  
457 encoding when pyramidal to PV connectivity is characterized by a low feedback inhibition and  
458 a strong excitatory drive. A tentative parallel can be made with known clinical and experimental  
459 observations: indeed, it is well acknowledged that patients who do not respond to L-DOPA are  
460 unlikely to benefit from STN-DBS (1). Despite the effects of L-DOPA in cortical circuits not  
461 being well elucidated, L-DOPA is known to affect cortical excitability and its oscillatory  
462 properties (65,66): D2 agonist increases PV-mediated GABAergic transmission onto pyramidal  
463 cells *in vitro* (67), while dopamine microinjections decrease the firing rate of pyramidal cells in  
464 anesthetized animals (68-70). Hence, in line with our modeling prediction, impaired or  
465 abnormally low GABAergic inhibition from PV interneurons might prevent L-DOPA efficiency  
466 and STN-DBS-mediated effects. In such regimes of activity, it may be interesting to test  
467 whether direct activation of neuronal subpopulations, for instance through the optogenetic  
468 activation of SST interneurons (13), might be more efficient than STN-DBS. Altogether,  
469 because our work explored a wide variety of network configurations and regimes of activity,  
470 we could better delineate and predict the range of STN-DBS efficiency, that could be tested in  
471 the clinics and used for patient screening.

472 Finally, our modeling framework opens the door to an alternative method for adaptive  
473 STN-DBS. Indeed, recent clinical research has relied on machine-learning algorithms and  
474 aimed at detecting the physiological states of vigilance of the patient (awake active, awake at  
475 rest, asleep) as well as the type of movement in combination with the level of beta bursts for  
476 adjusting STN-DBS parameters (71-73). We propose that the accuracy with which simple  
477 machine-learning algorithms decode movement identity from brain activity could also be used  
478 for adjusting STN-DBS parameters. This criterion might encompass a broader range of  
479 pathological markers compared to a single parameter (such as the amplitude of beta power or  
480 duration of beta bursts) currently used in adaptive DBS. Whether this method is best adapted  
481 to cortical signals (using EEG or electrocorticography, which has a better signal-to-noise ratio)

482 or can be extended to other recording sites (for instance, STN) remains to be tested.  
483 Importantly, our results indicate that this method could be implemented non-invasively, in  
484 contrast to current procedures relying on LFP features and requiring higher signal-to-noise  
485 ratio measurements such as electrocorticography (72). The setup would allow to dynamically  
486 define optimal STN-DBS parameters based on cortical readability levels and an automatized  
487 estimation of movement improvement (74,75). Since optimizing stimulation parameters  
488 requires frequent visits to the hospital, a stressful environment for patients, especially in the  
489 first months after implantation, relying on an objective measure such as the accuracy of  
490 decoding movement-related information from brain signals should help both patients and  
491 neurologists.

492 Of course, implementing a model of cortical activity always relies on major assumptions  
493 and simplifications. Our model uses simplified equations for describing neural activity, and  
494 considers the impact of STN-DBS on cortex as an excitatory pulse-like current input delivered  
495 at high-frequency to all neurons. This simplification, together with the absence of local  
496 connectivity motifs among cell types, causes a homogeneity of responses within each  
497 population. Nonetheless, our model accounts for non-trivial network effects, such as the  
498 decrease in the activity of pyramidal neurons and PV neurons observed *in vivo* (13), and  
499 reproduced in a majority of cases *in silico*. In addition, our results remained robust when  
500 changing the proportion of neurons recruited under STN-DBS. Finally, we opted for a stimulus-  
501 based definition of *information*. If Shannon information theory has also been used in  
502 neuroscience, we chose a more functional quantification metric, which could be linked to  
503 different aspects of PD symptoms, as discussed above, and potentially be useful in the clinics.  
504 Interestingly, our previous work showed a high consistency between Shannon information and  
505 stimulus-response correlations (40).

506 Overall, our theoretical work highlights how a strong and extremely regular external  
507 input could nonetheless be compatible with the enrichment of intrinsic dynamics and  
508 information encoding of cortical networks, especially when applied to pathological cases. This  
509 effect is mediated through the filtering properties of reciprocal synaptic connections together  
510 with the recruitment of SST interneurons which efficiently reduces and redistributes pyramidal  
511 cells activity. In line with our previous works (40,13) and other computational models (76,77),  
512 STN-DBS mechanisms of action might be subtler than imposing an “information lesion” onto  
513 basal ganglia circuits (29). Beyond the theoretical analyses, our work could also have  
514 important consequences in the clinics, for patient screening and fine-tuning of STN-DBS  
515 parameters.

516

517

## 518 **Materials and Methods**

519

520 **Spiking network models.** The network model of the motor cortex L5 consists of 800  
521 pyramidal, 120 PV and 80 SST cells. Neurons are modeled as adaptive exponential integrate-  
522 and-fire (78). The voltage of neuron  $i$  and its adaptation variable  $w$  satisfy the following system  
523 of differential equations:

$$524 \quad dv_t^i = \frac{1}{C} \left( -g_{leak} (v_t^i - E_{leak}) + g_{leak} \Delta_{thres} \exp\left(\frac{v_t^i - V_{thres}}{\Delta_{thres}}\right) - w_t^i + g_{exc} (E_{exc} - v_t^i) \right. \\ 525 \quad \left. + g_{inh} (E_{inh} - v_t^i) + I_{ext} + I_{DBS} + I_{stimulus} \right) dt + \frac{\sigma}{\sqrt{\tau_m}} d\xi_t^i \\ 526 \quad \tau_w dw_t^i = (a (v_t^i - E_{leak}) - w_t^i) dt$$

527 A spike is triggered when the voltage  $v$  reaches a threshold noted  $V_{thres}$ . Upon firing, the voltage  
528 is reset to a fixed value noted  $V_{reset}$ . Independent Gaussian white noise driven by a Brownian  
529 motion  $\xi_t^i$  was added to the dynamics of each neuron to account for the variety of sources of  
530 fluctuations of the voltage (79). Choices of intrinsic parameters and connectivity parameters  
531 (**Tables S5** and **S6**) were guided by experimental data, as previously detailed in (13). The  
532 presence of a synaptic connection between two neurons was randomly drawn as a Bernoulli  
533 random variable with probability  $p$  to reflect the density of connections between various  
534 populations. The connection probability  $p$  ranged between 0.1 and 0.6. Synaptic weights were  
535 set to a fixed value  $w$ . Time constants for exponential decay of post-synaptic events were set  
536 to  $\tau_e = 5$  ms and  $\tau_i = 8$  ms for excitatory and inhibitory synapses respectively. To investigate  
537 different activity regimes, we randomly varied the connectivity weights between pyramidal cells  
538 and PV neurons ( $w_e$ : synaptic weight from pyramidal cells to PV neurons; and  $w_i$ : from PV to  
539 pyramidal cells) and the external input  $I_{ext}$  to pyramidal neurons.

540 To mimic the somatic impact of STN-DBS on cortical neurons, we added an external  
541 current  $I_{DBS}$  to the equation of the voltage variable in every cell of the network. More precisely,  
542 considering the periodic nature of STN-DBS-induced somatic currents,  $I_{DBS}$  corresponds to a  
543 series of square pulses (of 2 ms duration and 200 pA amplitude, repeated at 130 Hz, unless  
544 otherwise stated), corresponding to the depolarizations induced by each pulse of DBS. These  
545 depolarizations are the source of various anatomical and experimental observations of a  
546 cortical impact of DBS: first pyramidal cells can be antidromically activated through the  
547 hyperdirect pathway and orthodromically through the STN-cortex pathway (48, 49, 12).  
548 Antidromic spikes can also excite PV interneurons through the axon collaterals of pyramidal  
549 cells (50) and SST neurons are activated under STN-DBS (13). Finally, additional recruitment  
550 may come from a filtered STN-DBS input passing through the entire cortico-thalamic-basal  
551 ganglia loops. Due to these different putative activation pathways,  $I_{DBS}$  might impact neurons  
552 with specific delays, chosen to be: 0 ms for half of pyramidal and PV cells (fast antidromic  
553 pathways), 2 ms for the other half of pyramidal cells (orthodromic loops), and modulo 2 ms for  
554 SST interneurons (slow antidromic pathways to superficial layers and synaptic transmission).  
555 Note that the presence of such delays had no impact on network dynamics. Simulations of the  
556 network activity were done using a custom code developed in MATLAB R2022 (The  
557 Mathworks, Natick, MA, USA) using a Euler-Maruyama scheme with time step  $dt = 0.05$  ms.

558

559 **Analyses. In the absence of a stimulus.** For each network configuration, the firing rate and  
560 synchronization indices of the different neuronal populations in the absence of a stimulus were



561 computed based on the average of 20 simulations lasting 300 ms (after an initial transient of  
562 200 ms). Spike variance was estimated as the variance of the moving sum of all pyramidal  
563 cells' spiking activity (with a window of 5 ms). This moving sum forms a time series typically  
564 characterized by peaks of activity, which are more or less exacerbated depending on the level  
565 of synchronized firing. Entropy was also calculated based on this moving sum, following  
566 Shannon's definition, using 20 uniformly spaced bins from 0 to its maximal value. The Fano  
567 factor was defined as the average of the variance over the mean firing rate of all pyramidal  
568 cells over the variance for every 5 ms bin. The intrinsic frequency of the network was computed  
569 as the peak frequency of the modulus of the fast Fourier transform applied on the moving sum  
570 of pyramidal cells spiking. Unless specified otherwise, the firing rate and entropy measures  
571 are specifically applied to pyramidal cells only, and were used for a 2D description of neuronal  
572 activity.

573

574 *Stimuli.* In order to test the capacity of the network to discriminate and respond selectively to  
575 inputs, an additional current was injected to a subset of pyramidal cells (200 randomly chosen  
576 cells).

577 *Simple stimuli.* A set of nine simple stimuli were each presented during 500 ms: 2 constant  
578 inputs (70 and 60 pA amplitude), 4 ramps (from 0 to 70 and 0 to 60 pA upwards and  
579 downwards), and 3 Ornstein-Uhlenbeck noises (with different means, variances and time  
580 constants).

581 *Naturalistic stimuli.* Naturalistic stimuli originated from utterances recorded in MATLAB,  
582 obtained from 9 different voices. Overall, we could use 29 different sentences in French, with  
583 4 shared meanings ("Je suis à Brandeis", "J'habite à Paris", "Je suis au Collège", "J'enregistre  
584 ma voix"). Each sentence was repeated 20 times. Each audio recording lasted 2.5 seconds.  
585 To align all repetitions of the same sound stimuli, the beginning and end of each repetition  
586 were identified from a threshold crossing condition, common to all the repetitions of the same  
587 sound, except for some instances characterized by lower overall volume or higher noise, and  
588 for which thresholds were adjusted. For each aligned sentence, a spectrogram was computed  
589 based on the amplitude of the short-time Fourier transform of our signal: a windowing was  
590 made using segments of length 50, and 40 samples of overlap between adjoining segments.  
591 In total, 38 sampling points were used to calculate the discrete Fourier transform. The  
592 spectrogram was renormalized using a maximal thresholding value of 0.1 or 0.2 (this difference  
593 arises from the use of different audio-recorders). In the end, we obtained a spectrogram  
594 composed of 20 frequency bands, which was then fed as input to the network. Across stimuli,  
595 we decided to use the same set of frequency-dependent receptor cells, such that every 10  
596 cells of the 200 receptor cells received the same frequency component over a 1000 ms of  
597 stimulus presentation. To make sure that all stimuli had similar input amplitudes (from 0 to  
598 about 70 pA) that were sufficient to elicit spiking activity, we multiplied the values of the  
599 spectrograms by 750 or 150. 2D maps as a function of DBS frequency and amplitude were  
600 obtained from the decoding of a subset of 12 stimuli (3 voices and 4 different meanings).

601 *Information measures.* We used the decoding accuracy of supervised learning algorithms  
602 trained on network responses to quantify the information capacity of the network. As described  
603 in (13), we used three supervised learning algorithms (nearest centroid classifier, multinomial  
604 logistic regression, and linear discriminant analysis) to estimate the efficiency with which  
605 neurons encoded various stimuli. Our approach consists of the following steps (**Fig. 2D**). First,  
606 our network responses are converted into a time-binned matrix  $M$  in which each row

607 corresponding to a given pyramidal cell contains the number of spikes emitted for every 10 ms.  
608 The first 200 rows corresponded to the responses of the pyramidal cells directly activated by  
609 the stimulus. In order to reproduce the highly convergent cortical motor inputs received by  
610 striatal neurons, we densify the responses by contracting the  $M$  matrices of  $800 \times 50$  (for simple  
611 stimuli) or  $800 \times 100$  (for naturalistic stimuli) dimensions into a  $100 \times 50$  (or  $100 \times 100$ ) matrix  
612  $S$ , defined as:  $S = W.M$ , where the weight matrix  $W$  is a random matrix, identical for all stimuli  
613 presentations, with each element generated from the uniform distribution on the interval  $[0, 1]$ .  
614 These  $S$  matrices are then used as inputs for the supervised-learning algorithms (80).  
615 For each condition, the dataset consisted of 60 repetitions for each of the 9 simple stimuli or  
616 20 repetitions for the naturalistic stimuli (with the same network parameters and convergence  
617 matrix  $W$ , but independent realizations of the intrinsic noise  $\xi$ , and in the case of naturalistic  
618 stimuli trial-to-trial variable input patterns). The classifiers were trained to discriminate the  
619 population response given the stimulus on 80% of the data sample, using stratified  $k$ -fold cross  
620 validation ( $k = 5$ ). This procedure was repeated using 5 independent seeds. In the case of  
621 naturalistic stimuli, the classifiers could be trained on different rules: recognizing voices,  
622 recognizing meaning, or recognizing both attributes. Training and testing of the classifiers were  
623 run using scikit-learn and keras packages in Python 3.5 (Python Software  
624 Foundation, [www.python.org](http://www.python.org)).

625  
626 **EEG acquisition. Participants.** Twenty human subjects participated in the study (see **Table**  
627 **S1** for detailed characteristics). All subjects gave informed consent for participating in the  
628 study. The study protocol was approved by the Ethics Committee of the APHP (Assistance  
629 Publique-Hôpitaux de Paris, Paris, France), commission CPP 09-2022. It is registered on  
630 ClinicalTrials.gov as NCT05284526. The cohort was composed of two groups:

631 - 10 control subjects  
632 - 10 PD patients with implanted STN-DBS and dopaminergic treated, recorded on four  
633 sessions: OFF STN-DBS and OFF medication; ON STN-DBS and OFF medication treatment;  
634 OFF STN-DBS and OFF medication; ON STN-DBS and ON medication. In this study, we  
635 focused our analyses exclusively on the OFF STN-DBS and OFF medication condition (OFF  
636 therapy) and the ON-STN-DBS and ON medication condition (ON therapy).

637 Patients with no cognitive impairment were selected (Montreal Cognitive Assessment score  $>$   
638 24). PD patients were diagnosed according to the current diagnostic criteria (81,82) and were  
639 recruited from the Neurology Department of the Avicenne University Hospital.

640 Recordings were performed at the Service de Physiologie, Explorations Fonctionnelles et  
641 Médecine du Sport, Avicenne University Hospital. The motor function of all patients was  
642 assessed for each condition before performing the task, using the International Parkinson and  
643 Movement Disorders Society Unified Parkinson's Disease Rating Scale part III (MDS-UPDRS  
644 III). During the experiment, patients were in a practically defined 'OFF medication' state, after  
645 overnight withdrawal (at least 12 hours) of PD medication. Sessions 'ON medication' started  
646 45-60 minutes after resuming the usual treatment.

647  
648 **Post-hoc exclusion.** Two PD patients were unable to perform any movements OFF therapy  
649 and were thus excluded from our analyses, since we could not reliably identify the time  
650 segments preceding movement. This increased uncertainty and the poorer performance  
651 resulting from it would have made our estimates of the PD patients decoding accuracy even  
652 lower, and it seemed a fairer comparison to estimate the accuracy only for patients able to

653 perform the movements. In another PD patient, the SNR of the EMG recordings during the  
654 pronation of the hand movement was too low for detecting muscle activation in STN-DBS OFF  
655 condition, due to the inability of the patient to clearly execute the movement; this patient was  
656 not included when analyzing all three movements for the same reasons. Finally, in one PD  
657 patient, large noisy fluctuations in EEG signals due to poor grounding of the electrodes  
658 prevented the extraction of clean EEG traces.

659  
660 *Task.* Subjects were positioned in a comfortable chair, half-seated with legs extended. They  
661 were asked to perform three different movements: index extension, clenching of the fist and  
662 pronation of the hand. The task was divided into eight blocks. Each block consisted of  
663 repeating each movement without external trigger, in a self-paced manner: when feasible, it  
664 was constituted of 25 repetitions of first index extension (musculus extensor indicis muscle),  
665 then 25 repetitions of clenching of the fist (flexor digitorum superficialis and profundus  
666 muscles), and finally another 25 repetitions of the pronation of the hand (pronator teres  
667 muscle). These hand movements correspond respectively to the 3.4, 3.5, 3.6 items of the  
668 MDS-UPDRS III (41). Overall, we could obtain at best about 200-250 repetitions for each  
669 movement. Subjects were asked to close their eyes and relax during movement execution.  
670 See for an example **Movie S1** and **S2**.

671  
672 *EEG recordings.* Signals were recording using a 15-channel EEG system (System PLUS  
673 Evolution manufactured by Micromed SpA, Version 1.07.00), sampled at 1024 Hz. Bipolar  
674 EMG of musculus extensor indicis, flexor digitorum superficialis and profundus, and pronator  
675 teres muscles, on the same side of movement, were also recorded. EEG cup electrodes  
676 (Capsulex 333102, MEI) were positioned manually and fix with plasters to ensure good stability  
677 across the different recording sessions. The following sites were recorded: {'Fp1', 'Fp2', 'F3',  
678 'F4', 'Fz', 'T3', 'T4', 'C3', 'C4', 'Cz', 'P3', 'P4'}. A reference electrode was positioned on the skin  
679 over the mastoid bone.

680  
681 *Extraction of movement-related potentials.* EEG signals were processed using custom  
682 MATLAB scripts. Signals were first band-pass filtered (1-100 Hz). 50 Hz line noise was  
683 removed when necessary (notch filter). Continuous EEG analysis resulted from the  
684 concatenation of movement execution periods, which contained no evident artefact (cut-off  
685 amplitude of 80  $\mu$ V). Movement-evoked potentials were obtained after determining the onset  
686 of movement for each trial using EMG recordings. On most cases, the SNR was sufficient to  
687 perform an automatic analysis based on a custom MATLAB script (using in particular  
688 *findchangepts* function). In other cases, in particular when the EMG trace was constituted of  
689 multiple upward and downward phases for a single movement, a manual inspection on the  
690 EMG trace was necessary to detect the onset of movement. Each movement onset was then  
691 verified based on video recordings alignment.

692  
693 *Statistics of EEG signals.* To compute beta band power, a fast Fourier transform was applied  
694 to the EEG voltage from individual electrodes, either on the full session of a given movement  
695 or on individual trials (using a 700 ms period preceding movement onset). Average beta band  
696 power was obtained by averaging the power in the 13-30 Hz frequency range (**Fig. 1B and C**),  
697 or in the 17-23 Hz range (**Fig. S1A**). As an alternative measure, the power of the highest peak  
698 in the 13-30 Hz band of the power spectrum was also extracted (**Fig. S1A**). In the 700 ms-long

699 movement-related potentials of the preparatory period, the maximal voltage amplitude (the  
700 envelope between maximal and minimal voltage values) of each trial were calculated and then  
701 averaged to yield a single data point per patient and per movement (**Fig. 1C** and **Fig. S1B**).  
702 Finally, the standard deviation of voltage fluctuations across trials was averaged over the 700  
703 ms window (**Fig. 1C** and **Fig. S1B**).

704

705 *Decoding EEG signals.* Movement-related potentials, either individual or averaged over six  
706 randomly chosen trials (average-based trials), constituted our input data stream for our  
707 decoding analyses. We selected the 700 ms period preceding movement onset, such as to  
708 focus exclusively on cortical preparatory activity. This way, signal decoding was not influenced  
709 by the quality of movement execution itself. In addition, these preparatory signals were not  
710 contaminated by low-frequency movement-related artefacts, which were clearly visible in some  
711 subjects. Signal decimation by a factor of 3 did not affect decoding accuracy and was therefore  
712 applied to speed up analyses. Signals used originated from individual electrodes (contralateral  
713 to the movement for Fp, F, C and P sites) or midline (Fz and Cz), a set of four contralateral or  
714 ipsilateral electrodes (Fp, F, C and P) or all electrodes (*i.e.* bilateral Fp, F, C, P, Fz and Cz  
715 electrodes, excluding T3 and T4 electrodes). In the case of decoding movement identity from  
716 EMG electrodes, the signal from the three EMG electrodes was used in a window of 700 ms  
717 (but compared to EEG traces focusing solely on the preparatory period, the start of the window  
718 used for EMG traces was 200 ms delayed so as to include the beginning of the movement).  
719 Jittered EEG data were obtained by realigning EEG traces to jittered movement onsets. The  
720 jitter was randomly defined across trials and drawn from a uniform distribution bounded at  $\pm$   
721 50, 100 or 200 ms (from the initially detected movement onset). Decoding was then performed  
722 using either a fixed number of trials over all the population or a fixed number of trials per  
723 patient. Trials were then randomly assigned to the training (80%) or test (20%) data set, using  
724 a stratified k-fold cross-validation ( $k=5$ ). This procedure was then repeated using 5  
725 independent seeds. The training and testing of the classifiers were run using scikit-learn  
726 (<https://scikit-learn.org/>) and keras (<https://keras.io/>) packages in Python 3.5 (Python Software  
727 Foundation, [www.python.org](http://www.python.org)). 100 individual trials or 20 average-based trials were used for  
728 comparing, in control subjects, the decoding accuracy between electrode sites and  
729 configurations. For comparing patients OFF and ON therapy and control subjects, a patient-  
730 based selection was performed, after ensuring the absence of correlation between the number  
731 of training trials and decoding accuracy. The number of individual trials varied from 46 to 251  
732 (and consequently average-based trials from 7 to 41). We ensured the absence of a significant  
733 correlation between decoding accuracy and the number of training templates (**Fig. S2B**). We  
734 used the same three algorithms previously described for decoding network spiking responses.

735

736 *Statistical Analysis.* Results are expressed as mean $\pm$ SEM. Statistical significance was  
737 assessed using R2022 (The Mathworks, Natick, MA, USA) or Jamovi (<http://www.jamovi.org>).  
738 For analysis of experimental data, paired or independent two-sampled two-tailed Wilcoxon  
739 sign rank were used to compare two distributions, or a one-sample Wilcoxon test for comparing  
740 decoding accuracy to chance level. Statistics of decoding results are summarized in **Tables**  
741 **S1**, **S2** and **S3**. Linear regression models were used to assess the dependency of one variable  
742 onto another (or multiple others). Correlations were assessed using Pearson or Spearman  
743 correlation coefficients.

744

745 **Code availability.** Custom MATLAB codes used for the computational model will be made  
746 publicly available on GitHub.

747

748

749

### 750 **Acknowledgments**

751 We thank J.E. Rubin, P. Miller, the members of the LV and JT laboratory for their helpful  
752 suggestions and critical comments, as well as their participation in the audio-recordings. We  
753 thank the Service de Physiologie, Explorations Fonctionnelles et Médecine du Sport, Avicenne  
754 University Hospital, and the Clinical Research Unit of Avicenne University Hospital, for making  
755 the EEG recordings possible. LV acknowledges support from Fondation pour la Recherche  
756 Médicale (FRM Equipe grant), Inserm, CNRS, Collège de France and Fondation Bettencourt  
757 Schueller. JT acknowledges partial support from the National Science Foundation Division of  
758 Mathematical Sciences 1951369 and National Institute of Health R01GM152811. This clinical  
759 part of this work was supported by a grant from Contrat de Recherche Clinique 2021  
760 (APHP211327). CP. was supported by a PhD grant from Ecole Normale Supérieure.

761

762 **Author contributions:** Conceptualization: JT, CP, LV, BD; JT and CP carried out the  
763 conception and the design of the computational model; CP analyzed the simulations of the  
764 model; BD recruited the cohort of patients for EEG recordings; SNWT, ADL and BD performed  
765 EEG acquisition; CP analyzed the EEG data; CP wrote the manuscript. JT, LV, BD and CP  
766 have edited and corrected the manuscript.

767

768 **Competing interests:** “All other authors declare they have no competing interests.”



## References

- 769  
770
- 771 1. Kalia, L. V., & Lang, A. E. Parkinson's disease. *The Lancet* **386**(9996), 896–912 (2015).
  - 772 2. Haslinger, B., et al. Event-related functional magnetic resonance imaging in  
773 Parkinson's disease before and after levodopa. *Brain* **124**(3), 558–570 (2001).
  - 774 3. Payoux, P., et al. Subthalamic nucleus stimulation reduces abnormal motor cortical  
775 overactivity in Parkinson disease. *Archives of Neurology* **61**(8) (2004).
  - 776 4. Lindenbach, D., & Bishop, C. Critical involvement of the motor cortex in the  
777 pathophysiology and treatment of Parkinson's disease. *Neuroscience & Biobehavioral*  
778 *Reviews* **37**(10), 2737–2750 (2013).
  - 779 5. Ridding, M. C., Rothwell, J. C., & Inzelberg, R. Changes in excitability of motor cortical  
780 circuitry in patients with Parkinson's disease. *Annals of Neurology* **37**(2), 181–188 (1995).
  - 781 6. Cunic, D., et al. Effects of subthalamic nucleus stimulation on motor cortex excitability  
782 in Parkinson's disease. *Neurology* **58**(11), 1665–1672 (2002).
  - 783 7. Lefaucheur, J.-P. Motor cortex dysfunction revealed by cortical excitability studies in  
784 Parkinson's disease: Influence of antiparkinsonian treatment and cortical stimulation. *Clinical*  
785 *Neurophysiology* **116**(2), 244–253 (2005).
  - 786 8. Chu, J., Wagle-Shukla, A., Gunraj, C., Lang, A. E., & Chen, R. Impaired presynaptic  
787 inhibition in the motor cortex in Parkinson's disease. *Neurology* **72**(9), 842–849 (2009).
  - 788 9. Stoffers, D., et al. Increased cortico-cortical functional connectivity in early-stage  
789 Parkinson's disease: an MEG study. *NeuroImage* **41**(2), 212–222 (2008).
  - 790 10. Pollok, B., et al. Motor-cortical oscillations in early stages of Parkinson's disease. *The*  
791 *Journal of Physiology* **590**(13), 3203–3212 (2012).
  - 792 11. Guo, L., et al. Dynamic rewiring of neural circuits in the motor cortex in mouse models  
793 of Parkinson's disease. *Nat Neurosci* **18**, 1299–1309 (2015).
  - 794 12. Degos, B., Deniau, J.-M., Chavez, M., & Maurice, N. Subthalamic nucleus high-  
795 frequency stimulation restores altered electrophysiological properties of cortical neurons in  
796 Parkinsonian rat. *PLoS ONE* **8**(12) (2013).
  - 797 13. Valverde, S., et al. Deep brain stimulation-guided optogenetic rescue of parkinsonian  
798 symptoms. *Nature Communications* **11**(1), 2388 (2020).
  - 799 14. Goldberg, J. A., et al. Enhanced synchrony among primary motor cortex neurons in the  
800 1-methyl-4-phenyl-1,2,3,6-tetrahydropyridine primate model of Parkinson's disease. *The*  
801 *Journal of Neuroscience* **22**(11), 4639–4653 (2002).
  - 802 15. Pasquereau, B., & Turner, R. S. Primary motor cortex of the parkinsonian monkey:  
803 Differential effects on the spontaneous activity of pyramidal tract-type-neurons. *Cerebral*  
804 *Cortex* **21**(6), 1362–1378 (2011).
  - 805 16. Mallet, N., et al. Disrupted dopamine transmission and the emergence of exaggerated  
806 beta oscillations in subthalamic nucleus and cerebral cortex. *The Journal of*  
807 *Neuroscience* **28**(18), 4795–4806 (2008).
  - 808 17. Brazhnik, E., et al. State-dependent spike and local field synchronization between  
809 motor cortex and substantia nigra in hemiparkinsonian rats. *Journal of Neuroscience* **32**(23),  
810 7869–7880 (2012).
  - 811 18. Li, Q., et al. Therapeutic deep brain stimulation in parkinsonian rats directly influences  
812 motor cortex. *Neuron* **76**(5), 1030–1041 (2012).
  - 813 19. Li, M., et al. Roles of motor cortex neuron classes in reach-related modulation for  
814 hemiparkinsonian Rats. *Frontiers in Neuroscience* **15** (2021).

- 815 20. Chen, K., Yang, G., So, K.-F., & Zhang, L. Activation of cortical somatostatin  
816 interneurons rescues synapse loss and motor deficits after acute MPTP infusion. *iScience* **17**,  
817 230–241 (2019).
- 818 21. Chu, H.Y., et al. Dysfunction of motor cortices in Parkinson's disease. *Cereb Cortex*  
819 **34**(7), bhae294 (2024).
- 820 22. Pasquereau, B., DeLong, M. R., & Turner, R. S. Primary motor cortex of the  
821 parkinsonian monkey: Altered encoding of active movement. *Brain* **139**(1), 127–143 (2016).
- 822 23. Aeed, F., Cermak, N., Schiller, J., & Schiller, Y. Intrinsic disruption of the M1 cortical  
823 network in a mouse model of Parkinson's disease. *Movement Disorders* **36**(7), 1565–1577  
824 (2021).
- 825 24. Watts, R. L., & Mandir, A. S. (1992). The role of motor cortex in the pathophysiology of  
826 voluntary movement deficits associated with parkinsonism. *Neurologic Clinics*, 10(2), 451–  
827 469.
- 828 25. Hyland, B. I., Seeger-Armbruster, S., Smither, R. A., & Parr-Brownlie, L. C. Altered  
829 recruitment of motor cortex neuronal activity during the grasping phase of skilled reaching in a  
830 chronic rat model of unilateral parkinsonism. *The Journal of Neuroscience* **39**(48), 9660–9672  
831 (2019).
- 832 26. Pollak, P., et al. Effets de la stimulation du noyau sous-thalamique dans la maladie de  
833 Parkinson [Effects of the stimulation of the subthalamic nucleus in Parkinson disease]. *Revue*  
834 *Neurologique* (Paris) **149**(3), 175-6 (1993).
- 835 27. Aum, D. J., & Tierney, T. S. Deep Brain Stimulation: Foundations and future trends.  
836 *Frontiers in Bioscience* **23**(1), 162–182 (2018).
- 837 28. Lozano, A. M., & Lipsman, N. Probing and regulating dysfunctional circuits using deep  
838 brain stimulation. *Neuron* **77**(3), 406–424 (2013).
- 839 29. Grill, W. M., Snyder, A. N., & Miocinovic, S. Deep brain stimulation creates an  
840 informational lesion of the stimulated nucleus. *NeuroReport* **15**(7), 1137–1140 (2004).
- 841 30. McIntyre, C. C., & Hahn, P. J. (2010). Network perspectives on the mechanisms of  
842 deep brain stimulation. *Neurobiology of Disease* **38**(3), 329–337.
- 843 31. Deniau, J.-M., Degos, B., Bosch, C., & Maurice, N. Deep Brain Stimulation  
844 Mechanisms: Beyond the concept of local functional inhibition. *European Journal of*  
845 *Neuroscience* **32**(7), 1080–1091 (2010).
- 846 32. Gradinaru, V., Mogri, M., Thompson, K. R., Henderson, J. M., & Deisseroth, K. Optical  
847 deconstruction of parkinsonian neural circuitry. *Science* **324**(5925), 354–359 (2009).
- 848 33. Ceballos-Baumann, A. O., et al. A positron emission tomographic study of subthalamic  
849 nucleus stimulation in Parkinson disease. *Archives of Neurology* **56**(8), 997 (1999).
- 850 34. Haslinger, B., Kalteis, K., Boecker, H., Alesch, F. & Ceballos-Baumann, A. Frequency-  
851 correlated decreases of motor cortex activity associated with subthalamic nucleus stimulation  
852 in Parkinson's disease. *NeuroImage* **28**, 598–606 (2005).
- 853 35. Pauls, K. A. M., et al. Cortical beta burst dynamics are altered in Parkinson's disease  
854 but normalized by deep brain stimulation. *NeuroImage* **257**, 119308 (2022).
- 855 36. Whitmer, D., et al. High frequency deep brain stimulation attenuates subthalamic and  
856 cortical rhythms in Parkinson's disease. *Frontiers in Human Neuroscience* **6** (2012).
- 857 37. Wang, D. D., et al. Pallidal deep-brain stimulation disrupts pallidal beta oscillations and  
858 coherence with primary motor cortex in Parkinson's disease. *The Journal of Neuroscience*  
859 **38**(19), 4556–4568 (2018).

- 860 38. Dauper, J., et al. Effects of subthalamic nucleus (STN) stimulation on motor cortex  
861 excitability. *Neurology* **59**(5), 700–706 (2002).
- 862 39. Fraix, V., Pollak, P., Vercueil, L., Benabid, A.-L., & Mauguière, F. Effects of subthalamic  
863 nucleus stimulation on motor cortex excitability in Parkinson's disease. *Clinical*  
864 *Neurophysiology* **119**(11), 2513–2518 (2008).
- 865 40. Touboul, J. D., Piette, C., Venance, L., & Ermentrout, G. B. Noise-induced  
866 synchronization and antiresonance in interacting excitable systems: Applications to deep brain  
867 stimulation in Parkinson's disease. *Physical Review X* **10**(1) (2020).
- 868 41. Goetz, C.G., et al. Movement Disorder Society-sponsored revision of the Unified  
869 Parkinson's Disease Rating Scale (MDS-UPDRS): Process, format and clinimetric testing  
870 plan. *Movement Disorders* **22**(1), 41-47 (2007).
- 871 42. Deecke, L., Scheid, P., & Kornhuber, H.H. Distribution of readiness potential, pre-  
872 motion positivity and motion potential of the human cerebral cortex preceding voluntary finger  
873 movements. *Exp. Brain Res.* **7**, 158-168 (1969).
- 874 43. Geraedts, V.J., et al. Clinical correlates of quantitative EEG in Parkinson disease: A  
875 systematic review. *Neurology* **91**(19) (2018).
- 876 44. Baarbé, J., Lizarraga, K., Tran, S., Saravanamuttu, J., & Chen, R. Cortical high-beta  
877 EEG response to dopaminergic therapy in Parkinson's disease. *Neurology* **94**(15) (2020).
- 878 45. Apicella, A. J., Wickersham, I. R., Seung, H. S., & Shepherd, G. M. Laminarly  
879 orthogonal excitation of fast-spiking and low-threshold-spiking interneurons in mouse motor  
880 cortex. *The Journal of Neuroscience* **32**(20), 7021–7033 (2012).
- 881 46. Pfeffer, C. K., Xue, M., He, M., Huang, Z. J., & Scanziani, M. Inhibition of inhibition in  
882 visual cortex: The logic of connections between molecularly distinct interneurons. *Nature*  
883 *Neuroscience* **16**(8), 1068–1076 (2013).
- 884 47. Chadderdon, G. L., et al. Motor cortex microcircuit simulation based on brain activity  
885 mapping. *Neural Computation* **26**(7), 1239–1262 (2014).
- 886 48. Baker, K.B., Montgomery, E.B., Jr, Rezai, A.R., Burgess, R., & Lüders, H.O.  
887 Subthalamic nucleus deep brain stimulus evoked potentials: physiological and therapeutic  
888 implications. *Movement disorders* **17**(5), 969–983 (2002).
- 889 49. Degos, B., Deniau, J. M., Le Cam, J., Mailly, P., Maurice, N. Evidence for a direct  
890 subthalamo-cortical loop circuit in the rat. *Eur J Neurosci.* **27**, 2599–2610 (2008).
- 891 50. Kang, G., & Lowery, M. M. Effects of antidromic and orthodromic activation of STN  
892 afferent axons during DBS in Parkinson's disease: A simulation study. *Frontiers in*  
893 *Computational Neuroscience* **8** (2014).
- 894 51. Brittain, J.-S., & Brown, P. Oscillations and the basal ganglia: Motor control and  
895 beyond. *NeuroImage* **85**, 637–647 (2014).
- 896 52. Artieda, A, J., Pastor, M. A., Lacruz, F., & Obeso, J. A. Temporal discrimination is  
897 abnormal in Parkinson's disease. *Brain* **115**(1), 199–210 (1992).
- 898 53. Sathian, K., Zangaladze, A., Green, J., Vitek, J. L., & DeLong, M. R. Tactile spatial  
899 acuity and roughness discrimination: Impairments due to aging and Parkinson's  
900 disease. *Neurology* **49**(1), 168–177 (1997).
- 901 54. Zia, S., Cody, F. W. J., & O'Boyle, D. J. Discrimination of bilateral differences in the loci  
902 of tactile stimulation is impaired in subjects with Parkinson's disease. *Clinical Anatomy* **16**(3),  
903 241–247 (2003).
- 904 55. Maschke, M., Tuite, P. J., Krawczewski, K., Pickett, K., & Konczak, J. Perception of  
905 heaviness in Parkinson's disease. *Movement Disorders* **21**(7), 1013–1018 (2006).

- 906 56. Konczak, J., et al. Parkinson's disease accelerates age-related decline in haptic  
907 perception by altering somatosensory integration. *Brain* **135**(11) (2012).
- 908 57. Escola, L., Michelet, T., Douillard, G., Guehl, D., Bioulac, B., & Burbaud, P. Disruption  
909 of the proprioceptive mapping in the medial wall of parkinsonian monkeys. *Annals of Neurology*  
910 **52**(5) (2002).
- 911 58. Tremblay, L., & Filion, M. Responses of pallidal neurons to striatal stimulation in intact  
912 waking monkeys. *Brain Research* **498**(1), 1–16 (1989).
- 913 59. Boraud, T., Bezard, E., Bioulac, B., & Gross, C. E. Ratio of inhibited-to-activated pallidal  
914 neurons decreases dramatically during passive limb movement in the MPTP-treated  
915 monkey. *Journal of Neurophysiology* **83**(3), 1760–1763 (2000).
- 916 60. Aman, J. E., Abosch, A., Bebler, M., Lu, C.-H., & Konczak, J. Subthalamic nucleus  
917 deep brain stimulation improves somatosensory function in Parkinson's disease. *Movement*  
918 *Disorders* **29**(2), 221–228 (2014).
- 919 61. Dogru Huzmeli, E., Yilmaz, A., & Okuyucu, E. Analysis of the effects of subthalamic  
920 nucleus deep brain stimulation on somatosensation in Parkinson's disease  
921 patients. *Neurological Sciences* **41**(4), 925–931 (2019).
- 922 62. Kühn, A. A., et al. High-frequency stimulation of the subthalamic nucleus suppresses  
923 oscillatory activity in patients with Parkinson's disease in parallel with improvement in motor  
924 performance. *Journal of Neuroscience* **28**(24), 6165–6173 (2008).
- 925 63. Oswal, A., et al. Deep brain stimulation modulates synchrony within spatially and  
926 spectrally distinct resting state networks in Parkinson's disease. *Brain* **139**(Pt 5), 1482-96  
927 (2016).
- 928 64. Hirschmann, J., Steina, A., Vesper, J., Florin, E., & Schnitzler, A. Neuronal oscillations  
929 predict deep brain stimulation outcome in parkinson's disease. *Brain Stimulation* **15**(3), 792–  
930 802 (2022).
- 931 65. Cousineau, J., Plateau, V., Baufreton, J., & Le Bon-Jégo, M. Dopaminergic modulation  
932 of primary motor cortex: From cellular and synaptic mechanisms underlying motor learning to  
933 cognitive symptoms in Parkinson's disease. *Neurobiology of Disease* **167**, 105674 (2022).
- 934 66. Cao, C., Li, D., Zhan, S., Zhang, C., Sun, B., & Litvak, V. L-DOPA treatment increases  
935 oscillatory power in the motor cortex of Parkinson's disease patients. *NeuroImage: Clinical* **26**,  
936 102255 (2020).
- 937 67. Cousineau, J., Lescouzères, L., Taupignon, A., Delgado-Zabalza, L., Valjent, E.,  
938 Baufreton, J., & Le Bon-Jégo, M. Dopamine D2-like receptors modulate intrinsic properties  
939 and synaptic transmission of parvalbumin interneurons in the mouse primary motor  
940 cortex. *Eneuro* **7**(3) (2020).
- 941 68. Huda, K., Salunga, T. L., & Matsunami, K. Dopaminergic inhibition of excitatory inputs  
942 onto pyramidal tract neurons in cat motor cortex. *Neuroscience Letters* **307**(3), 175–178  
943 (2001).
- 944 69. Huda, K., Salunga, T. L., Chowdhury, S. A., Kawashima, T., & Matsunami, K.  
945 Dopaminergic modulation of transcallosal activity of CAT motor cortical  
946 neurons. *Neuroscience Research* **33**(1), 33–40 (1999).
- 947 70. Awenowicz, P. W., & Porter, L. L. Local application of dopamine inhibits pyramidal tract  
948 neuron activity in the rodent motor cortex. *Journal of Neurophysiology* **88**(6), 3439–3451  
949 (2002).

- 950 71. Golshan, H. M., Hebb, A. O., Hanrahan, S. J., Nedrud, J., & Mahoor, M. H. A  
951 hierarchical structure for human behavior classification using STN local field  
952 potentials. *Journal of Neuroscience Methods* **293**, 254–263 (2018).
- 953 72. Gilron, R., et al. Long-term wireless streaming of neural recordings for circuit discovery  
954 and adaptive stimulation in individuals with Parkinson's disease. *Nature Biotechnology* **39**(9),  
955 1078–1085 (2021).
- 956 73. Merk, T., et al. Electrocorticography is superior to subthalamic local field potentials for  
957 movement decoding in parkinson's disease. *eLife* **11** (2022).
- 958 74. Lu, M., et al. Quantifying Parkinson's disease motor severity under uncertainty using  
959 MDS-UPDRS Videos. *Medical Image Analysis* **73**, 102179 (2021).
- 960 75. Vignoud, G., Desjardins, C., Salardaine, Q., Mongin, M., Garcin, B., Venance, L., &  
961 Degos, B. Video-based automated assessment of movement parameters consistent with  
962 MDS-UPDRS III in Parkinson's disease. *Journal of Parkinson's Disease* **12**(7), 2211–2222  
963 (2022).
- 964 76. Hauptmann, C., & Tass, P. A. Cumulative and after-effects of short and weak  
965 coordinated reset stimulation: A modeling study. *Journal of Neural Engineering* **6**(1), 016004  
966 (2009).
- 967 77. Adam, E. M., Brown, E. N., Kopell, N., & McCarthy, M. M. Deep brain stimulation in the  
968 subthalamic nucleus for Parkinson's disease can restore dynamics of striatal  
969 networks. *Proceedings of the National Academy of Sciences* **119**(19) (2022).

970  
971

972 **Additional references:**

- 973 78. Brette, R., & Gerstner, W. Adaptive exponential integrate-and-fire model as an  
974 effective description of neuronal activity. *Journal of Neurophysiology* **94**(5), 3637–3642 (2005).
- 975 79. Faisal, A.A., Selen, L.P. & Wolpert, D.M. Noise in the nervous system. *Nature Reviews*  
976 *Neuroscience* **9**(4), 292– 303 (2008).
- 977 80. Hastie, T., Tibshirani, R., & Friedman, J. *The elements of statistical learning* (Springer  
978 Series in Statistics, 2009).
- 979 81. Postuma, R.B., et al. MDS clinical diagnostic criteria for Parkinson's disease. *Mov*  
980 *Disord.* **30**(12):1591-601 (2015).
- 981 82. Postuma, R.B., et al. Validation of the MDS clinical diagnostic criteria for Parkinson's  
982 disease. *Mov Disord.* **33**(10):1601-1608 (2018).

983  
984  
985  
986  
987



988 **Figures, Figure Legends and Tables**  
989

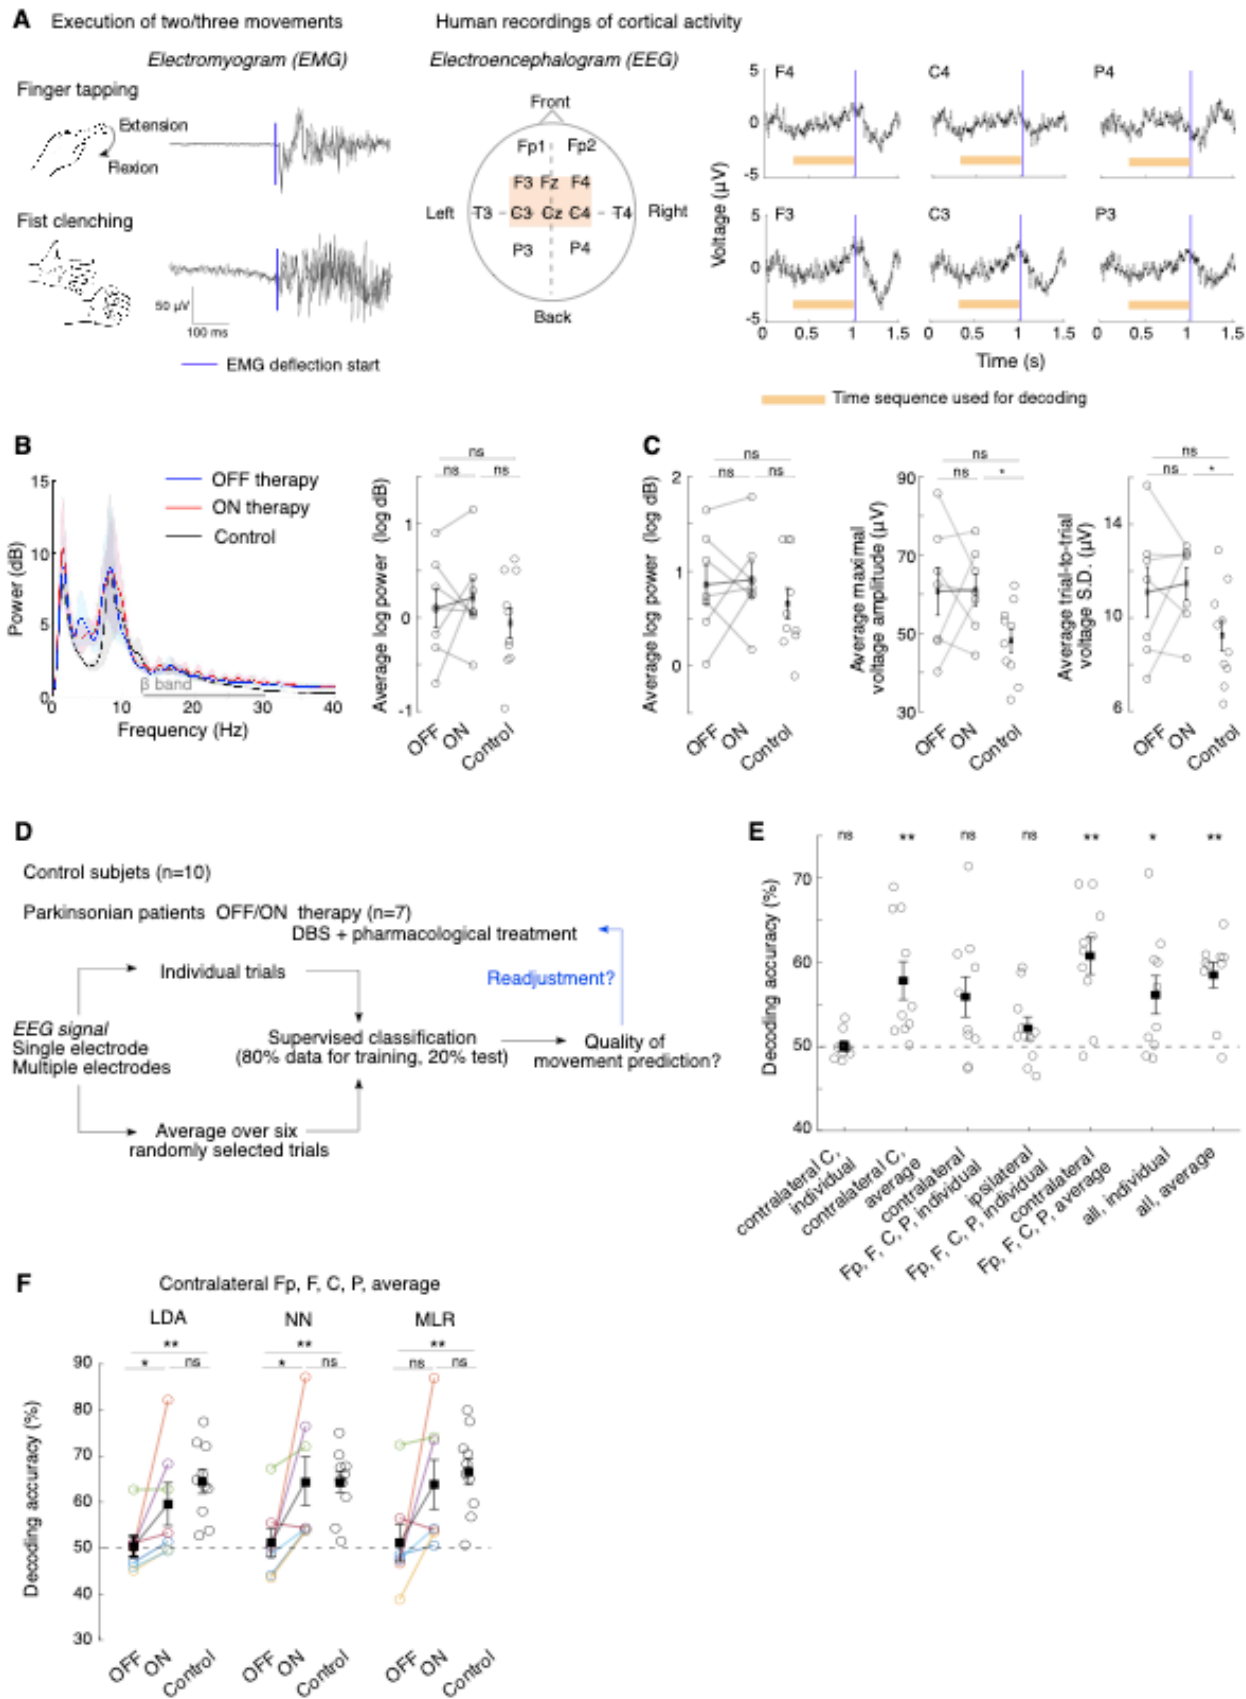

990  
991  
992

993 **Fig. 1: Altered information decoding from PD human EEG signals can be restored by**  
994 **STN-DBS and medication therapy. (A)** Clinical protocol. Left: Illustrative averaged  
995 electromyogram (EMG) traces after alignment with the movement onset extracted from EMG  
996 deflections (blue line). Middle: Electroencephalogram (EEG) electrode positions (orange  
997 window: primary motor cortex). Right: Illustrative averaged EEG potentials aligned to  
998 movement onset (blue line). The time period used for classifying movements (initiation period)  
999 is indicated in orange. **(B)** EEG power spectrum from contralateral C electrode during the entire  
1000 finger tapping session across conditions (left) and associated quantitative measure of mean  
1001 beta-band power in the 13-30 Hz frequency range (right). Stats: ON/OFF therapy (paired  
1002 Wilcoxon test,  $p=0.81$ ), OFF/Control and ON/Control (independent Wilcoxon test,  $p=0.60$  and  
1003  $p=0.60$  respectively). **(C)** Quantitative measures of EEG features from contralateral C  
1004 electrode during the initiation period for finger tapping movement. Left: Average beta-band  
1005 power measured for each trial (ON/OFF:  $p=0.81$ ; OFF/Control:  $p=0.37$ ; ON/Control:  $p=0.42$ );  
1006 Middle: Average maximal voltage amplitude measured for each trial (ON/OFF:  $p=0.94$ ;  
1007 OFF/Control:  $p=0.11$ ; ON/Control:  $p=0.033$ ); Right: trial-averaged standard deviation of the  
1008 voltage (ON/OFF:  $p=0.94$ ; OFF/Control:  $p=0.23$ ; ON/Control:  $p=0.043$ ). **(D)** Procedure for  
1009 classifying movement identity from EEG signals. Signals either from a single electrode or from  
1010 a combination of multiple electrodes, either from individual trials or from averaging of six  
1011 randomly chosen trials, are used to train classifiers. **(E)** Decoding accuracy for control subjects  
1012 (each dot corresponds to one subject) using linear discriminant analysis (LDA) for different  
1013 input signals. One-sample Wilcoxon test (chance level: 50%, **Table S2**). **(F)** Decoding  
1014 accuracy across three classifiers (LDA: linear discriminant analysis; NN: nearest-centroid and  
1015 MLR: multinomial logistic regression) between patients ON and OFF therapy (paired Wilcoxon  
1016 test) and with control subjects (independent Wilcoxon test). See **Table S3** for detailed  
1017 statistics. Four electrodes (Fp, F, C and P electrodes) contralateral to the movement side were  
1018 used.  
1019

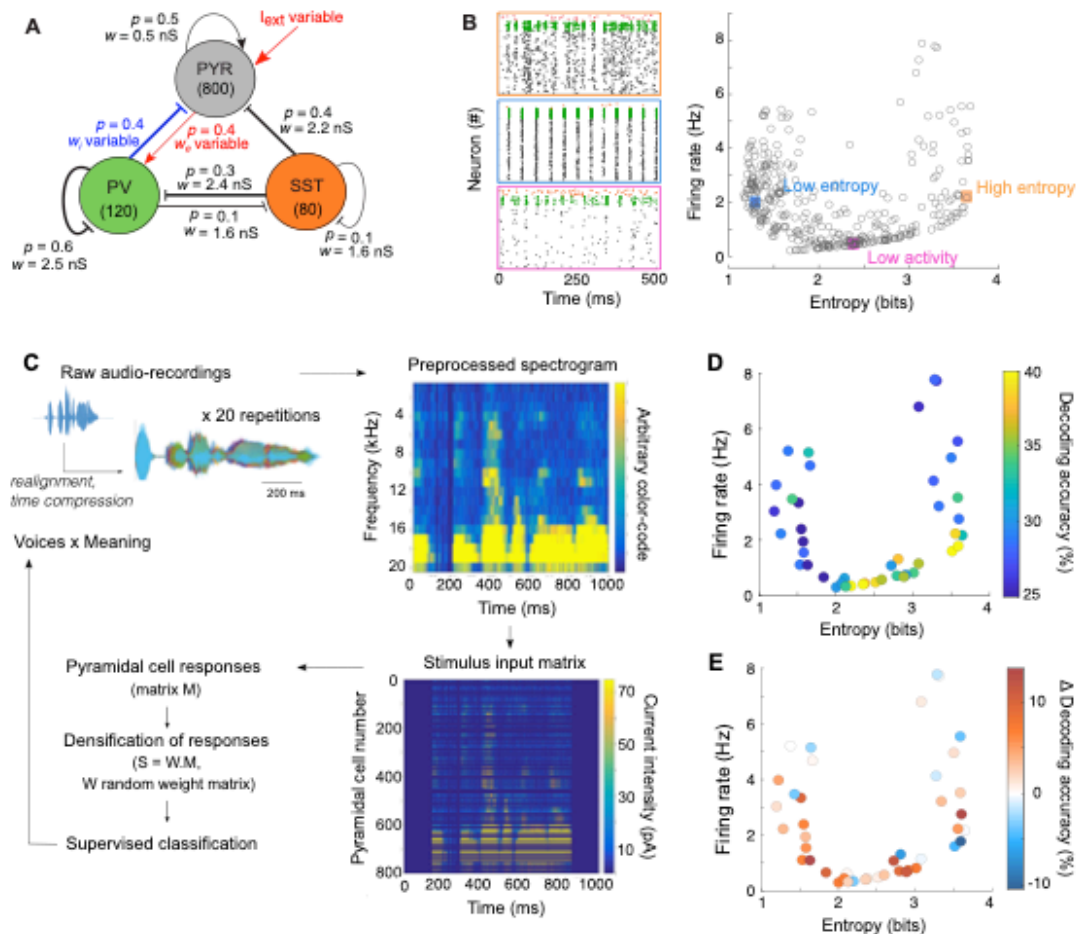

1020  
1021  
1022  
1023  
1024  
1025  
1026  
1027  
1028  
1029  
1030  
1031  
1032  
1033  
1034  
1035  
1036  
1037  
1038  
1039  
1040  
1041

**Fig. 2. STN-DBS improves the decoding accuracy of naturalistic stimuli in a cortical spiking network.** (A) Model architecture of layer V motor cortex, consisting of three cell types (PYR: pyramidal cells; PV: parvalbumin-expressing interneurons; SST: somatostatin-expressing interneurons) with population-specific connection probability  $p$  and synaptic weight  $w$  (arrow: excitatory, bar: inhibitory). Three parameters were varied: the external input to pyramidal cells  $I_{ext}$ , the pyramidal-to-PV excitatory synaptic weight  $w_e$ , and the PV-to-pyramidal inhibitory weight  $w_i$ . (B) Left: Raster plots corresponding to distinct activity regimes: high entropy (and a medium firing rate) in orange; low entropy (with a similar firing rate) in blue, and low activity (with a low firing rate) in pink. Right: Scatter plot of the 2D network profile (across 370 network configurations) as a function of the mean firing rate and entropy of pyramidal neurons (the entropy was computed based on the average probability of pyramidal cells firing a spike within 5 ms time binned intervals, normalized to the average firing rate). (C) To emulate naturalistic stimuli, we used audio recordings converted into spectrograms and turned into an input to pyramidal neurons. This resulted in complex spatio-temporal patterns with trial-to-trial variability and latent variables (meaning of the sentence or voice of the speaker). (D) Decoding accuracy (color-coded) when trained to recognize meaning (4 meanings, chance level: 25%) from pyramidal cells activity in the OFF STN-DBS condition, as a function of the entropy and firing rate of the pyramidal cells OFF STN-DBS. Multinomial logistic regression was used as the supervised machine-learning classifier. (E) Changes in decoding accuracy under STN-DBS (ON – OFF) when trained on each dataset. Fixed STN-DBS parameters (200 pA, 130 Hz) were used.

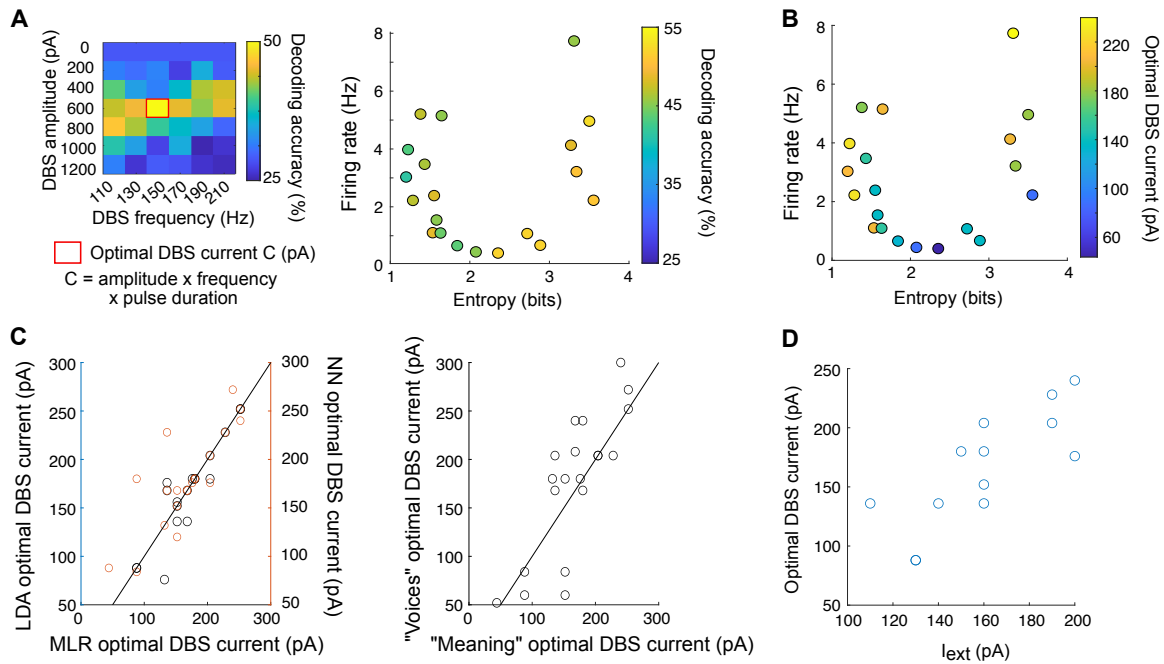

1042  
1043

1044 **Fig. 3. Optimizing STN-DBS parameters based on decoding accuracy and network**  
 1045 **parameters. (A)** Left: Illustrative map of decoding accuracy (color-coded) of the multinomial  
 1046 logistic regression when trained to recognize meaning as a function of STN-DBS frequency (x-  
 1047 axis) and amplitude (y-axis) for one network configuration. An optimal STN-DBS current (red  
 1048 rectangle) corresponds to the amplitude x frequency x pulse duration parameters associated  
 1049 with the highest decoding accuracy. Right: Decoding accuracy (color-coded) obtained for the  
 1050 optimal STN-DBS current as a function of the entropy and firing rate of pyramidal cells OFF  
 1051 STN-DBS. **(B)** Optimal STN-DBS current (color-coded) as a function of the entropy and firing  
 1052 rate of pyramidal cells OFF STN-DBS. **(C)** Right: Correlation between the optimal STN-DBS  
 1053 current found by all three classifiers (Pearson's correlation coefficient  $r$  and  $p$ -value:  $r(\text{MLR},$   
 1054  $\text{LDA}) = 0.92, p < 0.001$ ;  $r(\text{MLR}, \text{NN}) = 0.81, p < 0.001$ ). Left: Correlation between the optimal  
 1055 STN-DBS current found when training MLR on meaning recognition vs. voice recognition  
 1056 (Pearson's correlation coefficient  $r = 0.81, p < 0.001$ ). **(D)** Correlation between optimal STN-  
 1057 DBS current and external current  $I_{\text{ext}}$  added onto pyramidal cells (Pearson's correlation  
 1058 coefficient  $r = 0.81, p < 0.001$ ).

1059



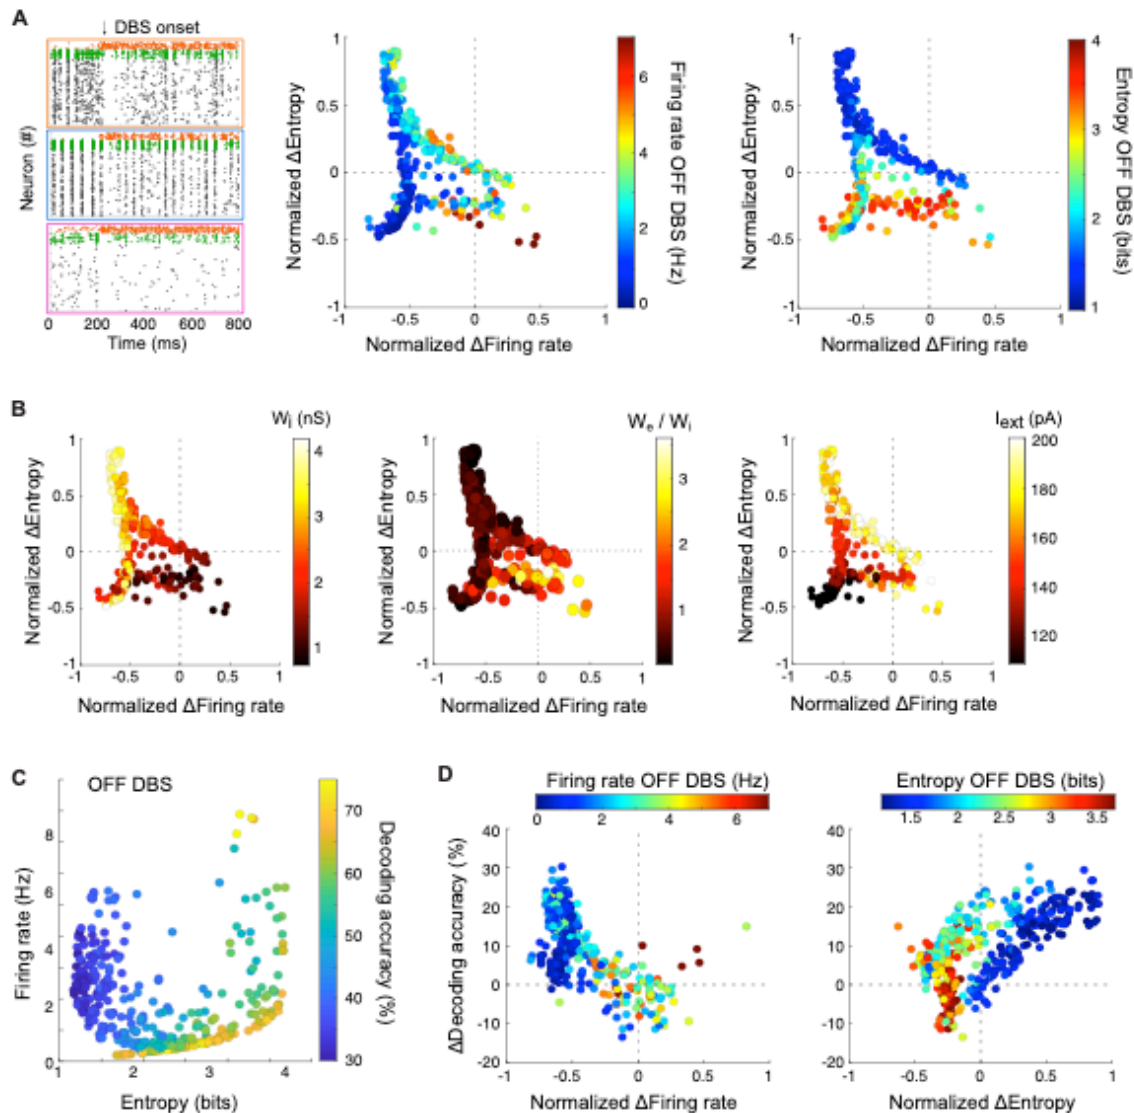

1060  
1061 **Fig. 4. STN-DBS mitigates the pathological activity of cortical networks by reducing**  
1062 **firing rates and synchrony, thereby restoring information capacity.**

1063 (A) Left: Raster plots of example networks before and after STN-DBS onset. The arrow  
1064 indicates the time when STN-DBS input (200 pA, 130 Hz) is added to all neurons of the  
1065 network. Normalized effects (ON-OFF/OFF) of STN-DBS on the firing rate of pyramidal cells  
1066 (x-axis) and entropy (y-axis) of their responses depending on their initial regime (color-coded;  
1067 middle: firing rate OFF STN-DBS; right: entropy OFF STN-DBS). (B) Impact of the parameters  
1068 of the model (color-coded, left:  $w_i$ , middle:  $w_e / w_i$ , right:  $I_{ext}$ ) on STN-DBS efficiency for decreasing  
1069 (x-axis) and desynchronizing (y-axis) the activity of pyramidal cells. (C) Supervised  
1070 classification of simple stimuli using machine-learning algorithms on the responses of all  
1071 pyramidal cells. Decoding accuracy in the OFF STN-DBS condition as a function of the firing  
1072 rate (y-axis) and entropy (x-axis) of pyramidal cells OFF STN-DBS. (D) Changes in decoding  
1073 accuracy under STN-DBS (ON – OFF) (y-axis) as a function of the normalized STN-DBS-  
1074 induced change in firing rate (left) or entropy (right) (x-axis). Color-coded are the initial firing  
1075 rate (left) and entropy (right) of pyramidal cells OFF STN-DBS.
